# Supplementary material for: Deciphering the mechanism of γ-cyclodextrin’s hydrophobic cavity hydration: an integrated experimental and theoretical study
Source: publisher site journal article supplement (doi:10.3762/bjoc.20.221), 2024-10-17
Supplement: Additional file 1 [file 1860-5397-20-221-S1.pdf]

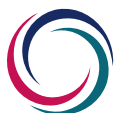

## Supporting Information

for

### **Deciphering the mechanism of $\gamma$ -cyclodextrin's hydrophobic cavity hydration: an integrated experimental and theoretical study**

Stiliyana Pereva, Stefan Dobrev, Tsveta Sarafska, Valya Nikolova, Silvia Angelova, Tony Spassov and Todor Dudev

*Beilstein J. Org. Chem.* **2024**, *20*, 2635–2643. [doi:10.3762/bjoc.20.221](https://doi.org/10.3762/bjoc.20.221)

### **Additional figures and table with optimized geometries for $\gamma$ -CD**

## Table of contents:

|                                                                                                                                                                                                                                                                                                                                                                                                                                                                                        |    |
|----------------------------------------------------------------------------------------------------------------------------------------------------------------------------------------------------------------------------------------------------------------------------------------------------------------------------------------------------------------------------------------------------------------------------------------------------------------------------------------|----|
| <b>Figure S1.</b> Schematic representation of $\gamma$ -CD-H <sub>2</sub> O complexes with water molecule located at different positions, and M062X/6-311++G(d,p)//M062X/6-31G(d,p) calculated relative enthalpies ( $\Delta H^{78}$ ) of the respective complexes, in kcal mol <sup>-1</sup> . $\gamma$ -CD-H <sub>2</sub> O ( <i>f</i> ) is a complex in which a single water molecule is located outside the CD cavity, near the oxygen atom of one of the glucopyranose units..... | S2 |
| <b>Figure S2.</b> H-bonds in $\gamma$ -CD-H <sub>2</sub> O ( <i>a</i> ) and $\gamma$ -CD-H <sub>2</sub> O ( <i>d</i> ) complexes. ....                                                                                                                                                                                                                                                                                                                                                 | S2 |
| <b>Table S1.</b> M062X/6-31G(d,p) optimized geometries of $\gamma$ -CD, selected $\gamma$ -CD- <i>n</i> H <sub>2</sub> O ( <i>n</i> = 1-7) complexes, and a cluster of 7 water molecules. ....                                                                                                                                                                                                                                                                                         | S3 |

**Figure S1.** Schematic representation of  $\gamma$ -CD-H<sub>2</sub>O complexes with water molecule located at different positions, and M062X/6-311++G(d,p)//M062X/6-31G(d,p) calculated relative enthalpies ( $\Delta H^{78}$ ) of the respective complexes, in kcal mol<sup>-1</sup>.  $\gamma$ -CD-H<sub>2</sub>O (*f*) is a complex in which a single water molecule is located outside the CD cavity, near the oxygen atom of one of the glucopyranose units.

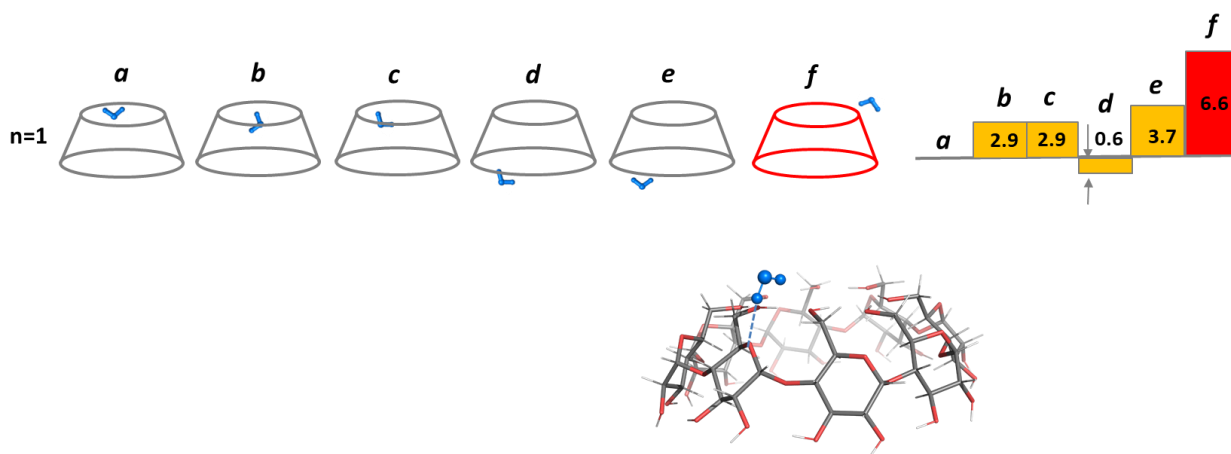

**Figure S2.** H-bonds in  $\gamma$ -CD-H<sub>2</sub>O (*a*) and  $\gamma$ -CD-H<sub>2</sub>O (*d*) complexes.

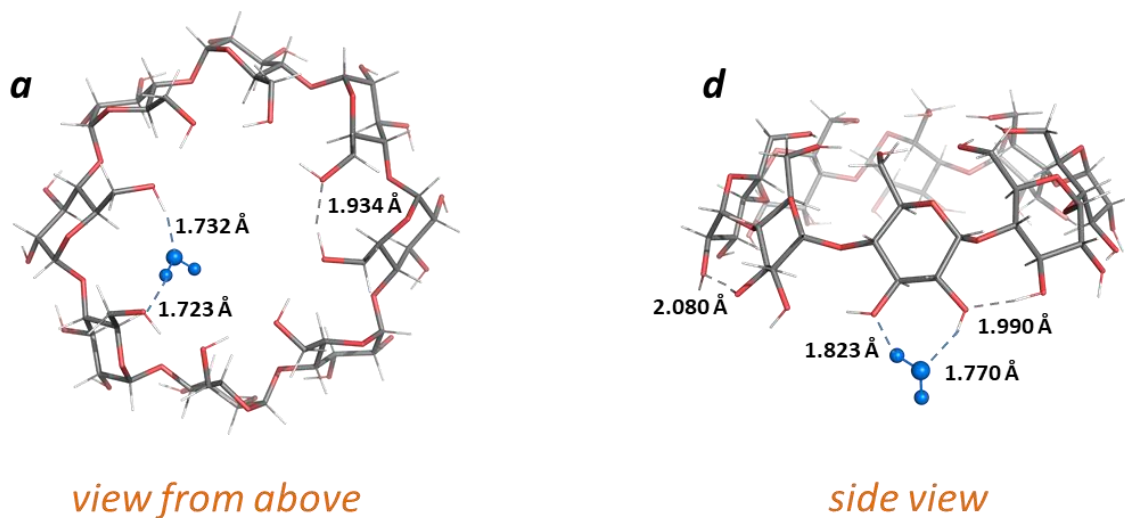

**Table S1.** M062X/6-31G(d,p) optimized geometries of  $\gamma$ -CD, selected  $\gamma$ -CD- $n$ H<sub>2</sub>O ( $n = 1-7$ ) complexes, and a cluster of 7 water molecules.

| <b><math>\gamma</math>-CD</b> |              |              |              |
|-------------------------------|--------------|--------------|--------------|
| 6                             | 1.065743000  | -6.749738000 | 0.139061000  |
| 6                             | 0.197080000  | -7.342359000 | -0.969302000 |
| 6                             | -0.966496000 | -6.424075000 | -1.291448000 |
| 6                             | -1.684189000 | -6.050316000 | -0.003626000 |
| 6                             | -0.690933000 | -5.392729000 | 0.954952000  |
| 6                             | -1.269603000 | -4.871614000 | 2.275235000  |
| 8                             | 1.736368000  | -5.637251000 | -0.375387000 |
| 8                             | 1.009378000  | -7.571892000 | -2.101331000 |
| 8                             | -1.805098000 | -7.112188000 | -2.184971000 |
| 8                             | 0.282994000  | -6.403875000 | 1.253388000  |
| 8                             | -1.177108000 | -3.461214000 | 2.362789000  |
| 1                             | -2.068260000 | -6.964735000 | 0.473576000  |
| 1                             | 1.782808000  | -7.498511000 | 0.494820000  |
| 1                             | -0.219607000 | -8.288697000 | -0.593231000 |
| 1                             | -0.570470000 | -5.499009000 | -1.741899000 |
| 1                             | -0.198377000 | -4.548157000 | 0.455466000  |
| 1                             | -2.329243000 | -5.122882000 | 2.367863000  |
| 1                             | -0.720384000 | -5.353350000 | 3.094392000  |
| 1                             | 0.408773000  | -7.792827000 | -2.826360000 |
| 1                             | -2.634761000 | -6.610580000 | -2.275964000 |
| 1                             | -0.224891000 | -3.247583000 | 2.407736000  |
| 6                             | -4.021894000 | -5.528366000 | 0.130327000  |
| 6                             | -5.051683000 | -5.328471000 | -0.980630000 |
| 6                             | -5.226142000 | -3.854905000 | -1.296093000 |
| 6                             | -5.472129000 | -3.089673000 | -0.004877000 |
| 6                             | -4.306957000 | -3.330994000 | 0.955638000  |
| 6                             | -4.351480000 | -2.559184000 | 2.279392000  |
| 8                             | -2.758907000 | -5.212115000 | -0.377076000 |
| 8                             | -4.635404000 | -6.060613000 | -2.114132000 |
| 8                             | -6.305697000 | -3.746116000 | -2.189556000 |
| 8                             | -4.334341000 | -4.735982000 | 1.247709000  |
| 8                             | -3.292422000 | -1.623723000 | 2.372744000  |
| 1                             | -6.390899000 | -3.467765000 | 0.468883000  |
| 1                             | -4.044759000 | -6.566706000 | 0.480685000  |
| 1                             | -6.016516000 | -5.705185000 | -0.609277000 |
| 1                             | -4.292406000 | -3.476065000 | -1.743648000 |
| 1                             | -3.359835000 | -3.080803000 | 0.459970000  |
| 1                             | -5.280652000 | -1.991548000 | 2.373470000  |
| 1                             | -4.301959000 | -3.291681000 | 3.095463000  |
| 1                             | -5.215743000 | -5.792291000 | -2.839564000 |
| 1                             | -6.543486000 | -2.805424000 | -2.272164000 |
| 1                             | -2.464898000 | -2.141474000 | 2.412714000  |
| 6                             | -6.752577000 | -1.065444000 | 0.141203000  |
| 6                             | -7.346179000 | -0.197107000 | -0.966808000 |
| 6                             | -6.427960000 | 0.966232000  | -1.290189000 |
| 6                             | -6.052578000 | 1.684090000  | -0.002900000 |
| 6                             | -5.394523000 | 0.690827000  | 0.955521000  |
| 6                             | -4.872119000 | 1.269303000  | 2.275308000  |

|   |              |              |              |
|---|--------------|--------------|--------------|
| 8 | -5.640475000 | -1.736065000 | -0.373992000 |
| 8 | -7.576915000 | -1.009697000 | -2.098386000 |
| 8 | -7.116970000 | 1.804742000  | -2.183086000 |
| 8 | -6.405829000 | -0.282480000 | 1.255061000  |
| 8 | -3.461544000 | 1.177322000  | 2.360904000  |
| 1 | -6.966244000 | 2.068609000  | 0.475387000  |
| 1 | -7.500993000 | -1.782465000 | 0.497805000  |
| 1 | -8.292079000 | 0.219826000  | -0.589897000 |
| 1 | -5.503507000 | 0.569833000  | -1.741564000 |
| 1 | -4.550655000 | 0.197699000  | 0.455388000  |
| 1 | -5.123966000 | 2.328738000  | 2.368704000  |
| 1 | -5.352297000 | 0.719444000  | 3.094926000  |
| 1 | -7.798092000 | -0.409213000 | -2.823447000 |
| 1 | -6.614958000 | 2.634008000  | -2.275534000 |
| 1 | -3.247749000 | 0.225140000  | 2.405950000  |
| 6 | -5.529786000 | 4.021725000  | 0.130244000  |
| 6 | -5.329258000 | 5.050917000  | -0.981148000 |
| 6 | -3.855579000 | 5.223768000  | -1.297057000 |
| 6 | -3.090197000 | 5.470019000  | -0.005979000 |
| 6 | -3.332078000 | 4.305455000  | 0.955199000  |
| 6 | -2.559778000 | 4.350105000  | 2.278639000  |
| 8 | -5.214509000 | 2.758562000  | -0.377398000 |
| 8 | -6.062100000 | 4.634813000  | -2.114266000 |
| 8 | -3.745888000 | 6.302569000  | -2.191313000 |
| 8 | -4.737051000 | 4.334078000  | 1.247480000  |
| 8 | -1.623784000 | 3.291579000  | 2.371221000  |
| 1 | -3.468258000 | 6.389043000  | 0.467320000  |
| 1 | -6.568085000 | 4.045308000  | 0.480700000  |
| 1 | -5.704902000 | 6.016308000  | -0.610170000 |
| 1 | -3.477675000 | 4.289370000  | -1.744012000 |
| 1 | -3.082798000 | 3.357781000  | 0.460120000  |
| 1 | -1.992603000 | 5.279561000  | 2.372719000  |
| 1 | -3.291869000 | 4.300062000  | 3.095067000  |
| 1 | -5.793366000 | 5.214452000  | -2.840101000 |
| 1 | -2.805038000 | 6.539771000  | -2.273788000 |
| 1 | -2.141347000 | 2.463937000  | 2.410963000  |
| 6 | -1.065663000 | 6.750224000  | 0.139978000  |
| 6 | -0.196922000 | 7.343415000  | -0.968012000 |
| 6 | 0.966732000  | 6.425370000  | -1.290637000 |
| 6 | 1.684187000  | 6.050550000  | -0.002995000 |
| 6 | 0.690625000  | 5.392262000  | 0.954774000  |
| 6 | 1.268603000  | 4.869645000  | 2.274719000  |
| 8 | -1.736552000 | 5.638197000  | -0.375132000 |
| 8 | -1.009127000 | 7.573618000  | -2.099968000 |
| 8 | 1.805520000  | 7.114162000  | -2.183463000 |
| 8 | -0.283012000 | 6.403358000  | 1.254065000  |
| 8 | 1.177259000  | 3.459085000  | 2.359770000  |
| 1 | 2.068125000  | 6.964506000  | 0.475194000  |
| 1 | -1.782441000 | 7.498961000  | 0.496399000  |
| 1 | 0.219679000  | 8.289541000  | -0.591311000 |
| 1 | 0.570769000  | 5.500639000  | -1.741842000 |
| 1 | 0.197789000  | 4.548435000  | 0.454301000  |
| 1 | 2.327917000  | 5.121794000  | 2.368792000  |

|   |              |              |              |
|---|--------------|--------------|--------------|
| 1 | 0.718166000  | 5.349489000  | 3.094158000  |
| 1 | -0.408449000 | 7.795062000  | -2.824778000 |
| 1 | 2.635164000  | 6.612565000  | -2.274723000 |
| 1 | 0.225124000  | 3.244779000  | 2.403360000  |
| 6 | 4.022004000  | 5.528488000  | 0.130868000  |
| 6 | 5.051980000  | 5.328541000  | -0.979924000 |
| 6 | 5.226531000  | 3.855039000  | -1.295764000 |
| 6 | 5.471902000  | 3.089638000  | -0.004615000 |
| 6 | 4.306009000  | 3.330822000  | 0.955014000  |
| 6 | 4.348754000  | 2.557482000  | 2.277906000  |
| 8 | 2.759069000  | 5.212787000  | -0.377044000 |
| 8 | 4.636054000  | 6.060968000  | -2.113374000 |
| 8 | 6.306379000  | 3.746619000  | -2.188935000 |
| 8 | 4.333929000  | 4.735618000  | 1.248188000  |
| 8 | 3.289056000  | 1.622733000  | 2.369161000  |
| 1 | 6.390221000  | 3.467774000  | 0.469974000  |
| 1 | 4.045136000  | 6.566736000  | 0.481467000  |
| 1 | 6.016768000  | 5.705054000  | -0.608248000 |
| 1 | 4.293001000  | 3.476276000  | -1.743810000 |
| 1 | 3.359223000  | 3.081791000  | 0.458140000  |
| 1 | 5.277439000  | 1.989070000  | 2.372072000  |
| 1 | 4.299166000  | 3.289032000  | 3.094839000  |
| 1 | 5.216560000  | 5.792760000  | -2.838713000 |
| 1 | 6.544041000  | 2.805950000  | -2.272093000 |
| 1 | 2.461840000  | 2.141100000  | 2.408403000  |
| 6 | 6.752904000  | 1.065567000  | 0.141650000  |
| 6 | 7.346719000  | 0.196805000  | -0.965970000 |
| 6 | 6.428431000  | -0.966357000 | -1.289544000 |
| 6 | 6.052711000  | -1.684027000 | -0.002280000 |
| 6 | 5.394644000  | -0.690825000 | 0.955934000  |
| 6 | 4.872161000  | -1.270316000 | 2.275325000  |
| 8 | 5.640906000  | 1.736069000  | -0.373873000 |
| 8 | 7.578177000  | 1.009096000  | -2.097623000 |
| 8 | 7.117522000  | -1.805009000 | -2.182258000 |
| 8 | 6.406006000  | 0.282606000  | 1.255603000  |
| 8 | 3.461627000  | -1.177990000 | 2.361441000  |
| 1 | 6.966291000  | -2.068642000 | 0.476100000  |
| 1 | 7.501261000  | 1.782669000  | 0.498201000  |
| 1 | 8.292351000  | -0.220327000 | -0.588606000 |
| 1 | 5.504163000  | -0.569835000 | -1.741183000 |
| 1 | 4.550816000  | -0.197627000 | 0.455834000  |
| 1 | 5.123446000  | -2.329997000 | 2.367676000  |
| 1 | 5.352770000  | -0.721337000 | 3.095305000  |
| 1 | 7.799515000  | 0.408378000  | -2.822437000 |
| 1 | 6.615364000  | -2.634153000 | -2.275010000 |
| 1 | 3.247952000  | -0.225764000 | 2.406601000  |
| 6 | 5.529880000  | -4.021679000 | 0.129707000  |
| 6 | 5.328934000  | -5.050154000 | -0.982222000 |
| 6 | 3.855137000  | -5.222537000 | -1.297687000 |
| 6 | 3.090183000  | -5.469640000 | -0.006537000 |
| 6 | 3.332545000  | -4.305925000 | 0.955532000  |
| 6 | 2.561074000  | -4.351858000 | 2.279420000  |
| 8 | 5.214148000  | -2.758147000 | -0.376498000 |

|                                                 |             |              |              |
|-------------------------------------------------|-------------|--------------|--------------|
| 8                                               | 6.061319000 | -4.633507000 | -2.115432000 |
| 8                                               | 3.745042000 | -6.300570000 | -2.192824000 |
| 8                                               | 4.737676000 | -4.334621000 | 1.247130000  |
| 8                                               | 1.625749000 | -3.292819000 | 2.374041000  |
| 1                                               | 3.468144000 | -6.389149000 | 0.465905000  |
| 1                                               | 6.568364000 | -4.045520000 | 0.479587000  |
| 1                                               | 5.704659000 | -6.015781000 | -0.611943000 |
| 1                                               | 3.477212000 | -4.287717000 | -1.743744000 |
| 1                                               | 3.082979000 | -3.357779000 | 0.461500000  |
| 1                                               | 1.993374000 | -5.281063000 | 2.372787000  |
| 1                                               | 3.293788000 | -4.303192000 | 3.095366000  |
| 1                                               | 5.792333000 | -5.212859000 | -2.841406000 |
| 1                                               | 2.804174000 | -6.537791000 | -2.275092000 |
| 1                                               | 2.143660000 | -2.465409000 | 2.414698000  |
| <b><math>\gamma</math>-CD-H<sub>2</sub>O(a)</b> |             |              |              |
| 6                                               | 6.615442000 | 1.871140000  | 0.207943000  |
| 6                                               | 7.383801000 | 0.998953000  | -0.781648000 |
| 6                                               | 6.650742000 | -0.307177000 | -0.996670000 |
| 6                                               | 6.383035000 | -0.982693000 | 0.336513000  |
| 6                                               | 5.655612000 | -0.026547000 | 1.284688000  |
| 6                                               | 5.508717000 | -0.589011000 | 2.686507000  |
| 8                                               | 5.402165000 | 2.244773000  | -0.383473000 |
| 8                                               | 7.520545000 | 1.706419000  | -1.997344000 |
| 8                                               | 7.445419000 | -1.100106000 | -1.841240000 |
| 8                                               | 6.411739000 | 1.182904000  | 1.411800000  |
| 8                                               | 4.520227000 | 0.081432000  | 3.447250000  |
| 1                                               | 7.340559000 | -1.297263000 | 0.780796000  |
| 1                                               | 7.204581000 | 2.758928000  | 0.464957000  |
| 1                                               | 8.370768000 | 0.780670000  | -0.347953000 |
| 1                                               | 5.673739000 | -0.083863000 | -1.455652000 |
| 1                                               | 4.661629000 | 0.192540000  | 0.873119000  |
| 1                                               | 5.205276000 | -1.638450000 | 2.625953000  |
| 1                                               | 6.487726000 | -0.532311000 | 3.182795000  |
| 1                                               | 7.841871000 | 1.062614000  | -2.644846000 |
| 1                                               | 7.081384000 | -2.003924000 | -1.847115000 |
| 1                                               | 4.546178000 | 1.038413000  | 3.255105000  |
| 6                                               | 5.882832000 | -3.343459000 | 0.608965000  |
| 6                                               | 5.908374000 | -4.394446000 | -0.502014000 |
| 6                                               | 4.513534000 | -4.603788000 | -1.061544000 |
| 6                                               | 3.557064000 | -4.886188000 | 0.085357000  |
| 6                                               | 3.589010000 | -3.722106000 | 1.072957000  |
| 6                                               | 2.633415000 | -3.851410000 | 2.259399000  |
| 8                                               | 5.587026000 | -2.110090000 | 0.023087000  |
| 8                                               | 6.808595000 | -3.973515000 | -1.506970000 |
| 8                                               | 4.588824000 | -5.675222000 | -1.969510000 |
| 8                                               | 4.930213000 | -3.682082000 | 1.585220000  |
| 8                                               | 1.426952000 | -3.157170000 | 2.014949000  |
| 1                                               | 3.899984000 | -5.780987000 | 0.626761000  |
| 1                                               | 6.848959000 | -3.304891000 | 1.126161000  |
| 1                                               | 6.242528000 | -5.344814000 | -0.060433000 |
| 1                                               | 4.191232000 | -3.675523000 | -1.560443000 |
| 1                                               | 3.365825000 | -2.774658000 | 0.566081000  |

|   |              |              |              |
|---|--------------|--------------|--------------|
| 1 | 2.370679000  | -4.898944000 | 2.439744000  |
| 1 | 3.146683000  | -3.459781000 | 3.148249000  |
| 1 | 6.663361000  | -4.565948000 | -2.258168000 |
| 1 | 3.691161000  | -5.871280000 | -2.292513000 |
| 1 | 1.645995000  | -2.200746000 | 1.973076000  |
| 6 | 1.732919000  | -6.385105000 | -0.232443000 |
| 6 | 1.006101000  | -6.858269000 | -1.491184000 |
| 6 | -0.264141000 | -6.062543000 | -1.721658000 |
| 6 | -1.086714000 | -6.063678000 | -0.443653000 |
| 6 | -0.249752000 | -5.473624000 | 0.690021000  |
| 6 | -0.959814000 | -5.329909000 | 2.041809000  |
| 8 | 2.281780000  | -5.122098000 | -0.476279000 |
| 8 | 1.892752000  | -6.761393000 | -2.586021000 |
| 8 | -0.947860000 | -6.663783000 | -2.793068000 |
| 8 | 0.866407000  | -6.359379000 | 0.870877000  |
| 8 | -1.132238000 | -3.972358000 | 2.403053000  |
| 1 | -1.351106000 | -7.100479000 | -0.185191000 |
| 1 | 2.523320000  | -7.100538000 | 0.022826000  |
| 1 | 0.713368000  | -7.906069000 | -1.324217000 |
| 1 | 0.007421000  | -5.019302000 | -1.952408000 |
| 1 | 0.120004000  | -4.483600000 | 0.395967000  |
| 1 | -1.956435000 | -5.776828000 | 2.018405000  |
| 1 | -0.355405000 | -5.860710000 | 2.789382000  |
| 1 | 1.363424000  | -6.905233000 | -3.382105000 |
| 1 | -1.848747000 | -6.295852000 | -2.823625000 |
| 1 | -0.235403000 | -3.579851000 | 2.420799000  |
| 6 | -3.479806000 | -5.867193000 | -0.330914000 |
| 6 | -4.498702000 | -5.637617000 | -1.447659000 |
| 6 | -4.877165000 | -4.171086000 | -1.548678000 |
| 6 | -5.251277000 | -3.647487000 | -0.171021000 |
| 6 | -4.083933000 | -3.874494000 | 0.789369000  |
| 6 | -4.251613000 | -3.319070000 | 2.208977000  |
| 8 | -2.257113000 | -5.322238000 | -0.729841000 |
| 8 | -3.950606000 | -6.120510000 | -2.656401000 |
| 8 | -5.946738000 | -4.073552000 | -2.456202000 |
| 8 | -3.926790000 | -5.297781000 | 0.872930000  |
| 8 | -3.319563000 | -2.286757000 | 2.477801000  |
| 1 | -6.123730000 | -4.206539000 | 0.201192000  |
| 1 | -3.374086000 | -6.940831000 | -0.135635000 |
| 1 | -5.408888000 | -6.196499000 | -1.183490000 |
| 1 | -3.998869000 | -3.604622000 | -1.900197000 |
| 1 | -3.171003000 | -3.431267000 | 0.371213000  |
| 1 | -5.245096000 | -2.892954000 | 2.359287000  |
| 1 | -4.115477000 | -4.153918000 | 2.908076000  |
| 1 | -4.553905000 | -5.844462000 | -3.359600000 |
| 1 | -6.354327000 | -3.195429000 | -2.351870000 |
| 1 | -2.454002000 | -2.737900000 | 2.512800000  |
| 6 | -6.710622000 | -1.804209000 | 0.328828000  |
| 6 | -7.518484000 | -0.929921000 | -0.629300000 |
| 6 | -6.784498000 | 0.363668000  | -0.927968000 |
| 6 | -6.338117000 | 1.013957000  | 0.372272000  |
| 6 | -5.473881000 | 0.030022000  | 1.159894000  |
| 6 | -4.860181000 | 0.555845000  | 2.462314000  |



|   |              |              |              |
|---|--------------|--------------|--------------|
| 8 | -5.593612000 | -2.288297000 | -0.356342000 |
| 8 | -7.765747000 | -1.671607000 | -1.805351000 |
| 8 | -7.662973000 | 1.185646000  | -1.655033000 |
| 8 | -6.334430000 | -1.074510000 | 1.468518000  |
| 8 | -3.442832000 | 0.547806000  | 2.408157000  |
| 1 | -7.223328000 | 1.264449000  | 0.976364000  |
| 1 | -7.327012000 | -2.635566000 | 0.690712000  |
| 1 | -8.462109000 | -0.669888000 | -0.126544000 |
| 1 | -5.880081000 | 0.125861000  | -1.512293000 |
| 1 | -4.646783000 | -0.316478000 | 0.526954000  |
| 1 | -5.160839000 | 1.588495000  | 2.653590000  |
| 1 | -5.221079000 | -0.078133000 | 3.281548000  |
| 1 | -8.159686000 | -1.055033000 | -2.437612000 |
| 1 | -7.278025000 | 2.078796000  | -1.701362000 |
| 1 | -3.192088000 | -0.394808000 | 2.409667000  |
| 6 | -5.973078000 | 3.371832000  | 0.675342000  |
| 6 | -6.042086000 | 4.500227000  | -0.351731000 |
| 6 | -4.660082000 | 4.791171000  | -0.903572000 |
| 6 | -3.687252000 | 4.992013000  | 0.248684000  |
| 6 | -3.687022000 | 3.757497000  | 1.149622000  |
| 6 | -2.709604000 | 3.798011000  | 2.330543000  |
| 8 | -5.656373000 | 2.193809000  | -0.002718000 |
| 8 | -6.942541000 | 4.123640000  | -1.371832000 |
| 8 | -4.765402000 | 5.937383000  | -1.710749000 |
| 8 | -5.021017000 | 3.662470000  | 1.668598000  |
| 8 | -1.685940000 | 2.824530000  | 2.202754000  |
| 1 | -4.016078000 | 5.850515000  | 0.853490000  |
| 1 | -6.932564000 | 3.271673000  | 1.195990000  |
| 1 | -6.396700000 | 5.404286000  | 0.165614000  |
| 1 | -4.324583000 | 3.917695000  | -1.486149000 |
| 1 | -3.457881000 | 2.861586000  | 0.558324000  |
| 1 | -2.212109000 | 4.770400000  | 2.389396000  |
| 1 | -3.287770000 | 3.642239000  | 3.250276000  |
| 1 | -6.836728000 | 4.774446000  | -2.079435000 |
| 1 | -3.873068000 | 6.188942000  | -2.008032000 |
| 1 | -2.121231000 | 1.954360000  | 2.280942000  |
| 6 | -1.803928000 | 6.452793000  | 0.048336000  |
| 6 | -1.121627000 | 7.047497000  | -1.182985000 |
| 6 | 0.051057000  | 6.183759000  | -1.600933000 |
| 6 | 0.941909000  | 5.949889000  | -0.391026000 |
| 6 | 0.135083000  | 5.275105000  | 0.718541000  |
| 6 | 0.924729000  | 4.910420000  | 1.979638000  |
| 8 | -2.428412000 | 5.264207000  | -0.333339000 |
| 8 | -2.080935000 | 7.168747000  | -2.211344000 |
| 8 | 0.729037000  | 6.862302000  | -2.629570000 |
| 8 | -0.876772000 | 6.225712000  | 1.081833000  |
| 8 | 1.104021000  | 3.508390000  | 2.103038000  |
| 1 | 1.283237000  | 6.920112000  | -0.000380000 |
| 1 | -2.535915000 | 7.162184000  | 0.450300000  |
| 1 | -0.728015000 | 8.035884000  | -0.901792000 |
| 1 | -0.331177000 | 5.209274000  | -1.944789000 |
| 1 | -0.341181000 | 4.358911000  | 0.344131000  |
| 1 | 1.923706000  | 5.357006000  | 1.951442000  |

|                                                  |              |              |              |
|--------------------------------------------------|--------------|--------------|--------------|
| 1                                                | 0.385311000  | 5.317887000  | 2.844470000  |
| 1                                                | -1.590840000 | 7.372352000  | -3.019683000 |
| 1                                                | 1.514601000  | 6.343245000  | -2.877510000 |
| 1                                                | 0.216389000  | 3.118495000  | 2.221941000  |
| 6                                                | 3.297184000  | 5.806344000  | -0.692863000 |
| 6                                                | 4.173040000  | 5.398000000  | -1.872804000 |
| 6                                                | 4.543508000  | 3.925912000  | -1.802723000 |
| 6                                                | 5.090211000  | 3.622879000  | -0.416803000 |
| 6                                                | 4.059366000  | 4.025586000  | 0.634311000  |
| 6                                                | 4.427482000  | 3.683147000  | 2.077542000  |
| 8                                                | 2.048874000  | 5.193955000  | -0.834939000 |
| 8                                                | 3.482446000  | 5.712061000  | -3.063448000 |
| 8                                                | 5.487192000  | 3.690409000  | -2.816211000 |
| 8                                                | 3.897932000  | 5.444088000  | 0.526166000  |
| 8                                                | 3.745134000  | 2.523432000  | 2.511446000  |
| 1                                                | 6.001586000  | 4.219968000  | -0.258267000 |
| 1                                                | 3.190380000  | 6.896672000  | -0.668570000 |
| 1                                                | 5.107684000  | 5.974446000  | -1.803055000 |
| 1                                                | 3.632409000  | 3.323151000  | -1.952561000 |
| 1                                                | 3.101669000  | 3.533681000  | 0.418350000  |
| 1                                                | 5.495756000  | 3.473495000  | 2.184680000  |
| 1                                                | 4.184671000  | 4.550397000  | 2.705466000  |
| 1                                                | 3.991010000  | 5.326514000  | -3.789466000 |
| 1                                                | 5.980487000  | 2.879002000  | -2.600143000 |
| 1                                                | 2.795197000  | 2.744849000  | 2.549790000  |
| 8                                                | 2.446392000  | -0.666134000 | 1.915095000  |
| 1                                                | 2.150512000  | 0.140187000  | 1.481152000  |
| 1                                                | 3.090145000  | -0.380509000 | 2.603520000  |
| <b><math>\gamma</math>-CD-2H<sub>2</sub>O(a)</b> |              |              |              |
| 6                                                | 6.961810000  | -0.651159000 | -0.246784000 |
| 6                                                | 7.535407000  | 0.412567000  | 0.686503000  |
| 6                                                | 6.545503000  | 1.545437000  | 0.854323000  |
| 6                                                | 6.116382000  | 2.072981000  | -0.503631000 |
| 6                                                | 5.597295000  | 0.933649000  | -1.381972000 |
| 6                                                | 5.290388000  | 1.380042000  | -2.799728000 |
| 8                                                | 5.862234000  | -1.241473000 | 0.386949000  |
| 8                                                | 7.825820000  | -0.191885000 | 1.930901000  |
| 8                                                | 7.169262000  | 2.534249000  | 1.634213000  |
| 8                                                | 6.601376000  | -0.082359000 | -1.475867000 |
| 8                                                | 4.453764000  | 0.472581000  | -3.490476000 |
| 1                                                | 6.977331000  | 2.559179000  | -0.989096000 |
| 1                                                | 7.724728000  | -1.405249000 | -0.473273000 |
| 1                                                | 8.450862000  | 0.813255000  | 0.226992000  |
| 1                                                | 5.647397000  | 1.146225000  | 1.353574000  |
| 1                                                | 4.686292000  | 0.522150000  | -0.927753000 |
| 1                                                | 4.759128000  | 2.336078000  | -2.769009000 |
| 1                                                | 6.242965000  | 1.519902000  | -3.330564000 |
| 1                                                | 8.032131000  | 0.532548000  | 2.538408000  |
| 1                                                | 6.649487000  | 3.355236000  | 1.564919000  |
| 1                                                | 4.729905000  | -0.444195000 | -3.289284000 |
| 6                                                | 5.091268000  | 4.232185000  | -0.924847000 |
| 6                                                | 5.004100000  | 5.363325000  | 0.101485000  |

|   |              |             |              |
|---|--------------|-------------|--------------|
| 6 | 3.652742000  | 5.341277000 | 0.789088000  |
| 6 | 2.559643000  | 5.324534000 | -0.266374000 |
| 6 | 2.733967000  | 4.111486000 | -1.176511000 |
| 6 | 1.671606000  | 3.972252000 | -2.271215000 |
| 8 | 5.102901000  | 3.021972000 | -0.226449000 |
| 8 | 6.057399000  | 5.213813000 | 1.031949000  |
| 8 | 3.581863000  | 6.483954000 | 1.606506000  |
| 8 | 4.006958000  | 4.290402000 | -1.816931000 |
| 8 | 0.671199000  | 3.038660000 | -1.908498000 |
| 1 | 2.658582000  | 6.219463000 | -0.899257000 |
| 1 | 5.995143000  | 4.335027000 | -1.537038000 |
| 1 | 5.097792000  | 6.318864000 | -0.435314000 |
| 1 | 3.575449000  | 4.416215000 | 1.382753000  |
| 1 | 2.746803000  | 3.180614000 | -0.595691000 |
| 1 | 1.169213000  | 4.929016000 | -2.448225000 |
| 1 | 2.182638000  | 3.667139000 | -3.193901000 |
| 1 | 5.870286000  | 5.838738000 | 1.746752000  |
| 1 | 2.705845000  | 6.506558000 | 2.030932000  |
| 1 | 1.102631000  | 2.157247000 | -1.903315000 |
| 6 | 0.527183000  | 6.477176000 | 0.176126000  |
| 6 | -0.180940000 | 6.858179000 | 1.475755000  |
| 6 | -1.236776000 | 5.830974000 | 1.832428000  |
| 6 | -2.134210000 | 5.612345000 | 0.624882000  |
| 6 | -1.285869000 | 5.147667000 | -0.556533000 |
| 6 | -2.060812000 | 4.807203000 | -1.832377000 |
| 8 | 1.320635000  | 5.351308000 | 0.413226000  |
| 8 | 0.790507000  | 6.992716000 | 2.491369000  |
| 8 | -1.951284000 | 6.323644000 | 2.939427000  |
| 8 | -0.395781000 | 6.233749000 | -0.854510000 |
| 8 | -2.065776000 | 3.410809000 | -2.081254000 |
| 1 | -2.610542000 | 6.564647000 | 0.346687000  |
| 1 | 1.144703000  | 7.316477000 | -0.163531000 |
| 1 | -0.693007000 | 7.816827000 | 1.302311000  |
| 1 | -0.737623000 | 4.877034000 | 2.067755000  |
| 1 | -0.698944000 | 4.264486000 | -0.275389000 |
| 1 | -3.106594000 | 5.119467000 | -1.750498000 |
| 1 | -1.596676000 | 5.354628000 | -2.662963000 |
| 1 | 0.308365000  | 7.060951000 | 3.326492000  |
| 1 | -2.677593000 | 5.705396000 | 3.134163000  |
| 1 | -1.129211000 | 3.141285000 | -2.171919000 |
| 6 | -4.447688000 | 5.091468000 | 0.917944000  |
| 6 | -5.226766000 | 4.469431000 | 2.071797000  |
| 6 | -5.339796000 | 2.964188000 | 1.902927000  |
| 6 | -5.844745000 | 2.650644000 | 0.503317000  |
| 6 | -4.941054000 | 3.308064000 | -0.535125000 |
| 6 | -5.309797000 | 3.023555000 | -1.993160000 |
| 8 | -3.117747000 | 4.673470000 | 1.011553000  |
| 8 | -4.580359000 | 4.815679000 | 3.278617000  |
| 8 | -6.212500000 | 2.499524000 | 2.902043000  |
| 8 | -5.012332000 | 4.721758000 | -0.316205000 |
| 8 | -4.443931000 | 2.063716000 | -2.560127000 |
| 1 | -6.863568000 | 3.054201000 | 0.395410000  |
| 1 | -4.512619000 | 6.184435000 | 0.967751000  |

|   |              |              |              |
|---|--------------|--------------|--------------|
| 1 | -6.245166000 | 4.885043000  | 2.043518000  |
| 1 | -4.335509000 | 2.522244000  | 2.009111000  |
| 1 | -3.907882000 | 2.968060000  | -0.387762000 |
| 1 | -6.323389000 | 2.622271000  | -2.084149000 |
| 1 | -5.269420000 | 3.973857000  | -2.542114000 |
| 1 | -4.997370000 | 4.292125000  | 3.976052000  |
| 1 | -6.548927000 | 1.624720000  | 2.637849000  |
| 1 | -3.549417000 | 2.456864000  | -2.574377000 |
| 6 | -6.962012000 | 0.651317000  | -0.247034000 |
| 6 | -7.535852000 | -0.412533000 | 0.685957000  |
| 6 | -6.545974000 | -1.545406000 | 0.853926000  |
| 6 | -6.116321000 | -2.072693000 | -0.503965000 |
| 6 | -5.596935000 | -0.933236000 | -1.381918000 |
| 6 | -5.289419000 | -1.379167000 | -2.799700000 |
| 8 | -5.862735000 | 1.241620000  | 0.387185000  |
| 8 | -7.826612000 | 0.191831000  | 1.930318000  |
| 8 | -7.170004000 | -2.534381000 | 1.633385000  |
| 8 | -6.601045000 | 0.082771000  | -1.476048000 |
| 8 | -4.452202000 | -0.471448000 | -3.489530000 |
| 1 | -6.977056000 | -2.558875000 | -0.989813000 |
| 1 | -7.724935000 | 1.405370000  | -0.473672000 |
| 1 | -8.451168000 | -0.813219000 | 0.226167000  |
| 1 | -5.648068000 | -1.146251000 | 1.353574000  |
| 1 | -4.686144000 | -0.521728000 | -0.927274000 |
| 1 | -4.758258000 | -2.335261000 | -2.769200000 |
| 1 | -6.241703000 | -1.518531000 | -3.331137000 |
| 1 | -8.033175000 | -0.532638000 | 2.537699000  |
| 1 | -6.649927000 | -3.355220000 | 1.564540000  |
| 1 | -4.729286000 | 0.445234000  | -3.289196000 |
| 6 | -5.091384000 | -4.232066000 | -0.924626000 |
| 6 | -5.004104000 | -5.362922000 | 0.102000000  |
| 6 | -3.652634000 | -5.340790000 | 0.789408000  |
| 6 | -2.559734000 | -5.324501000 | -0.266269000 |
| 6 | -2.734107000 | -4.111689000 | -1.176694000 |
| 6 | -1.672004000 | -3.972834000 | -2.271627000 |
| 8 | -5.102872000 | -3.021670000 | -0.226551000 |
| 8 | -6.057228000 | -5.213150000 | 1.032617000  |
| 8 | -3.581823000 | -6.483207000 | 1.607170000  |
| 8 | -4.007236000 | -4.290618000 | -1.816875000 |
| 8 | -0.670938000 | -3.040009000 | -1.908852000 |
| 1 | -2.658931000 | -6.219603000 | -0.898862000 |
| 1 | -5.995365000 | -4.335050000 | -1.536635000 |
| 1 | -5.097915000 | -6.318595000 | -0.434538000 |
| 1 | -3.575123000 | -4.415545000 | 1.382760000  |
| 1 | -2.746771000 | -3.180648000 | -0.596135000 |
| 1 | -1.170250000 | -4.929846000 | -2.449137000 |
| 1 | -2.183114000 | -3.667027000 | -3.194035000 |
| 1 | -5.869888000 | -5.837782000 | 1.747617000  |
| 1 | -2.705690000 | -6.505940000 | 2.031355000  |
| 1 | -1.101761000 | -2.158249000 | -1.903887000 |
| 6 | -0.527159000 | -6.477148000 | 0.175876000  |
| 6 | 0.180884000  | -6.858353000 | 1.475503000  |
| 6 | 1.236874000  | -5.831353000 | 1.832214000  |

|                                                  |              |              |              |
|--------------------------------------------------|--------------|--------------|--------------|
| 6                                                | 2.134486000  | -5.612910000 | 0.624749000  |
| 6                                                | 1.286329000  | -5.147991000 | -0.556705000 |
| 6                                                | 2.061400000  | -4.807825000 | -1.832581000 |
| 8                                                | -1.320533000 | -5.351214000 | 0.413005000  |
| 8                                                | -0.790548000 | -6.992768000 | 2.491153000  |
| 8                                                | 1.951196000  | -6.324044000 | 2.939321000  |
| 8                                                | 0.395857000  | -6.233770000 | -0.854710000 |
| 8                                                | 2.065800000  | -3.411583000 | -2.082355000 |
| 1                                                | 2.610798000  | -6.565258000 | 0.346675000  |
| 1                                                | -1.144761000 | -7.316346000 | -0.163877000 |
| 1                                                | 0.692769000  | -7.817084000 | 1.301996000  |
| 1                                                | 0.737879000  | -4.877297000 | 2.067413000  |
| 1                                                | 0.699727000  | -4.264615000 | -0.275488000 |
| 1                                                | 3.107297000  | -5.119555000 | -1.750228000 |
| 1                                                | 1.597744000  | -5.355983000 | -2.662954000 |
| 1                                                | -0.308391000 | -7.061166000 | 3.326254000  |
| 1                                                | 2.677615000  | -5.705919000 | 3.134039000  |
| 1                                                | 1.129092000  | -3.142390000 | -2.172708000 |
| 6                                                | 4.448010000  | -5.091788000 | 0.917549000  |
| 6                                                | 5.227180000  | -4.469782000 | 2.071355000  |
| 6                                                | 5.339961000  | -2.964444000 | 1.902801000  |
| 6                                                | 5.844326000  | -2.650517000 | 0.503053000  |
| 6                                                | 4.940298000  | -3.307884000 | -0.535080000 |
| 6                                                | 5.307856000  | -3.022427000 | -1.993177000 |
| 8                                                | 3.118028000  | -4.674136000 | 1.011679000  |
| 8                                                | 4.581032000  | -4.816387000 | 3.278203000  |
| 8                                                | 6.213052000  | -2.500063000 | 2.901713000  |
| 8                                                | 5.012320000  | -4.721605000 | -0.316650000 |
| 8                                                | 4.442305000  | -2.060939000 | -2.557909000 |
| 1                                                | 6.863095000  | -3.054049000 | 0.394632000  |
| 1                                                | 4.513217000  | -6.184754000 | 0.967056000  |
| 1                                                | 6.245660000  | -4.885170000 | 2.042806000  |
| 1                                                | 4.335695000  | -2.522598000 | 2.009521000  |
| 1                                                | 3.907043000  | -2.968450000 | -0.387067000 |
| 1                                                | 6.321849000  | -2.622322000 | -2.084971000 |
| 1                                                | 5.265608000  | -3.972073000 | -2.543109000 |
| 1                                                | 4.998122000  | -4.292947000 | 3.975677000  |
| 1                                                | 6.549146000  | -1.625046000 | 2.637802000  |
| 1                                                | 3.548050000  | -2.454607000 | -2.574037000 |
| 8                                                | 2.281309000  | 0.849350000  | -1.926472000 |
| 1                                                | 2.195302000  | 0.013541000  | -1.456572000 |
| 1                                                | 2.954378000  | 0.685572000  | -2.625999000 |
| 8                                                | -2.280616000 | -0.851225000 | -1.926486000 |
| 1                                                | -2.191327000 | -0.015840000 | -1.456541000 |
| 1                                                | -2.953875000 | -0.685607000 | -2.625501000 |
| <b><math>\gamma</math>-CD-3H<sub>2</sub>O(b)</b> |              |              |              |
| 6                                                | -5.686416000 | -3.679007000 | -0.423323000 |
| 6                                                | -5.504876000 | -4.915445000 | 0.454855000  |
| 6                                                | -4.040539000 | -5.158020000 | 0.761762000  |
| 6                                                | -3.237285000 | -5.152809000 | -0.529767000 |
| 6                                                | -3.467713000 | -3.828989000 | -1.257110000 |
| 6                                                | -2.726290000 | -3.691632000 | -2.571568000 |

|   |              |              |              |
|---|--------------|--------------|--------------|
| 8 | -5.399968000 | -2.546398000 | 0.343328000  |
| 8 | -6.251681000 | -4.730473000 | 1.639991000  |
| 8 | -3.965187000 | -6.385920000 | 1.439382000  |
| 8 | -4.866252000 | -3.740182000 | -1.556952000 |
| 8 | -2.676560000 | -2.352944000 | -3.010243000 |
| 1 | -3.572607000 | -5.982182000 | -1.171125000 |
| 1 | -6.717436000 | -3.640070000 | -0.793568000 |
| 1 | -5.877314000 | -5.785150000 | -0.107261000 |
| 1 | -3.671545000 | -4.327957000 | 1.387288000  |
| 1 | -3.170998000 | -2.996200000 | -0.603994000 |
| 1 | -1.695620000 | -4.034109000 | -2.439243000 |
| 1 | -3.209839000 | -4.341548000 | -3.316032000 |
| 1 | -6.011314000 | -5.464617000 | 2.222488000  |
| 1 | -3.031520000 | -6.659357000 | 1.489013000  |
| 1 | -3.570563000 | -1.954744000 | -2.952463000 |
| 6 | -1.147127000 | -6.323659000 | -0.819857000 |
| 6 | -0.410474000 | -7.155565000 | 0.229340000  |
| 6 | 0.670166000  | -6.325169000 | 0.892403000  |
| 6 | 1.554114000  | -5.719763000 | -0.185885000 |
| 6 | 0.707178000  | -4.863032000 | -1.125736000 |
| 6 | 1.480028000  | -4.189771000 | -2.262423000 |
| 8 | -1.883743000 | -5.338172000 | -0.155997000 |
| 8 | -1.342624000 | -7.636427000 | 1.174988000  |
| 8 | 1.385806000  | -7.185356000 | 1.745486000  |
| 8 | -0.237504000 | -5.759005000 | -1.729533000 |
| 8 | 1.863415000  | -2.877873000 | -1.919876000 |
| 1 | 1.985218000  | -6.530366000 | -0.792799000 |
| 1 | -1.808973000 | -6.962112000 | -1.415825000 |
| 1 | 0.077359000  | -7.994650000 | -0.288665000 |
| 1 | 0.193939000  | -5.505516000 | 1.453944000  |
| 1 | 0.172834000  | -4.082823000 | -0.565411000 |
| 1 | 2.393497000  | -4.750944000 | -2.491327000 |
| 1 | 0.836135000  | -4.200764000 | -3.152371000 |
| 1 | -0.819065000 | -7.986592000 | 1.909558000  |
| 1 | 2.104916000  | -6.679716000 | 2.163933000  |
| 1 | 1.052523000  | -2.297892000 | -1.911321000 |
| 6 | 3.878019000  | -5.504817000 | 0.275515000  |
| 6 | 4.657172000  | -5.350254000 | 1.580791000  |
| 6 | 4.901418000  | -3.884236000 | 1.869043000  |
| 6 | 5.543194000  | -3.229276000 | 0.655345000  |
| 6 | 4.640856000  | -3.424732000 | -0.562487000 |
| 6 | 5.145555000  | -2.804123000 | -1.870490000 |
| 8 | 2.586225000  | -5.004772000 | 0.463550000  |
| 8 | 3.930736000  | -5.973598000 | 2.618557000  |
| 8 | 5.723552000  | -3.799947000 | 3.007959000  |
| 8 | 4.528217000  | -4.839941000 | -0.775586000 |
| 8 | 4.260081000  | -1.817518000 | -2.369219000 |
| 1 | 6.526643000  | -3.684987000 | 0.463729000  |
| 1 | 3.843223000  | -6.562278000 | -0.009729000 |
| 1 | 5.633338000  | -5.839463000 | 1.443909000  |
| 1 | 3.928702000  | -3.395845000 | 2.039543000  |
| 1 | 3.649705000  | -3.008790000 | -0.342077000 |
| 1 | 6.115359000  | -2.318871000 | -1.723755000 |

|   |              |              |              |
|---|--------------|--------------|--------------|
| 1 | 5.272498000  | -3.618385000 | -2.595631000 |
| 1 | 4.332640000  | -5.683706000 | 3.448768000  |
| 1 | 5.936101000  | -2.862328000 | 3.157703000  |
| 1 | 3.341004000  | -2.177479000 | -2.325683000 |
| 6 | 6.944713000  | -1.273118000 | 0.865022000  |
| 6 | 7.095439000  | -0.268955000 | 2.003471000  |
| 6 | 6.087491000  | 0.862824000  | 1.851859000  |
| 6 | 6.177272000  | 1.427150000  | 0.443983000  |
| 6 | 6.005433000  | 0.310992000  | -0.584673000 |
| 6 | 6.012668000  | 0.776228000  | -2.043817000 |
| 8 | 5.692430000  | -1.865038000 | 1.001293000  |
| 8 | 6.921770000  | -0.955003000 | 3.224246000  |
| 8 | 6.390561000  | 1.821375000  | 2.833552000  |
| 8 | 7.073928000  | -0.615287000 | -0.377144000 |
| 8 | 4.697523000  | 0.795324000  | -2.575908000 |
| 1 | 7.169140000  | 1.884702000  | 0.315012000  |
| 1 | 7.742797000  | -2.023946000 | 0.899355000  |
| 1 | 8.103128000  | 0.167198000  | 1.938742000  |
| 1 | 5.076823000  | 0.444018000  | 1.993866000  |
| 1 | 5.051843000  | -0.201837000 | -0.411756000 |
| 1 | 6.414114000  | 1.787447000  | -2.152322000 |
| 1 | 6.650651000  | 0.091904000  | -2.615905000 |
| 1 | 6.883154000  | -0.282078000 | 3.917269000  |
| 1 | 6.030265000  | 2.680712000  | 2.553233000  |
| 1 | 4.455450000  | -0.153866000 | -2.696250000 |
| 6 | 5.523382000  | 3.595669000  | -0.375345000 |
| 6 | 5.355665000  | 4.807299000  | 0.539038000  |
| 6 | 3.893518000  | 5.108151000  | 0.787632000  |
| 6 | 3.152539000  | 5.215027000  | -0.535347000 |
| 6 | 3.362120000  | 3.931528000  | -1.334360000 |
| 6 | 2.722090000  | 3.914157000  | -2.707673000 |
| 8 | 5.169887000  | 2.426005000  | 0.325795000  |
| 8 | 6.037215000  | 4.550608000  | 1.749100000  |
| 8 | 3.836129000  | 6.297617000  | 1.529385000  |
| 8 | 4.766455000  | 3.735595000  | -1.541860000 |
| 8 | 2.670885000  | 2.606312000  | -3.241308000 |
| 1 | 3.527676000  | 6.083374000  | -1.098398000 |
| 1 | 6.566961000  | 3.528466000  | -0.700133000 |
| 1 | 5.796003000  | 5.673978000  | 0.023718000  |
| 1 | 3.451724000  | 4.264145000  | 1.344860000  |
| 1 | 2.943000000  | 3.094943000  | -0.761830000 |
| 1 | 1.692633000  | 4.275321000  | -2.630093000 |
| 1 | 3.280529000  | 4.592261000  | -3.368962000 |
| 1 | 5.809871000  | 5.278375000  | 2.345228000  |
| 1 | 2.918054000  | 6.625146000  | 1.522132000  |
| 1 | 3.546568000  | 2.183308000  | -3.165228000 |
| 6 | 1.042628000  | 6.363153000  | -0.859213000 |
| 6 | 0.315632000  | 7.197393000  | 0.195959000  |
| 6 | -0.736897000 | 6.354355000  | 0.888823000  |
| 6 | -1.627925000 | 5.711023000  | -0.161374000 |
| 6 | -0.778291000 | 4.858902000  | -1.101487000 |
| 6 | -1.555033000 | 4.129699000  | -2.199144000 |
| 8 | 1.794023000  | 5.393398000  | -0.187013000 |

|   |              |              |              |
|---|--------------|--------------|--------------|
| 8 | 1.266796000  | 7.692595000  | 1.116499000  |
| 8 | -1.456650000 | 7.205403000  | 1.746994000  |
| 8 | 0.129156000  | 5.767187000  | -1.743915000 |
| 8 | -1.859653000 | 2.803724000  | -1.824485000 |
| 1 | -2.093586000 | 6.497435000  | -0.774416000 |
| 1 | 1.691165000  | 6.997941000  | -1.473741000 |
| 1 | -0.192346000 | 8.027361000  | -0.316633000 |
| 1 | -0.232319000 | 5.552360000  | 1.451151000  |
| 1 | -0.207150000 | 4.109999000  | -0.535385000 |
| 1 | -2.507334000 | 4.635263000  | -2.396247000 |
| 1 | -0.950112000 | 4.160469000  | -3.115373000 |
| 1 | 0.756524000  | 8.055788000  | 1.854317000  |
| 1 | -2.133996000 | 6.678280000  | 2.207433000  |
| 1 | -1.027078000 | 2.282201000  | -1.797880000 |
| 6 | -3.924672000 | 5.472291000  | 0.389392000  |
| 6 | -4.663862000 | 5.243410000  | 1.705012000  |
| 6 | -4.901570000 | 3.763137000  | 1.931209000  |
| 6 | -5.558953000 | 3.167709000  | 0.694762000  |
| 6 | -4.674997000 | 3.429489000  | -0.521916000 |
| 6 | -5.169994000 | 2.839717000  | -1.845857000 |
| 8 | -2.620966000 | 4.975813000  | 0.519878000  |
| 8 | -3.906777000 | 5.823509000  | 2.747012000  |
| 8 | -5.708092000 | 3.632337000  | 3.075258000  |
| 8 | -4.590026000 | 4.854480000  | -0.678883000 |
| 8 | -4.355799000 | 1.764007000  | -2.271407000 |
| 1 | -6.539031000 | 3.643180000  | 0.537006000  |
| 1 | -3.904098000 | 6.543751000  | 0.159729000  |
| 1 | -5.645580000 | 5.733548000  | 1.620952000  |
| 1 | -3.926319000 | 3.268429000  | 2.067987000  |
| 1 | -3.673101000 | 3.029267000  | -0.325754000 |
| 1 | -6.184642000 | 2.442481000  | -1.748979000 |
| 1 | -5.179356000 | 3.649450000  | -2.588077000 |
| 1 | -4.293880000 | 5.510860000  | 3.575917000  |
| 1 | -5.970024000 | 2.697909000  | 3.158280000  |
| 1 | -3.422272000 | 2.057011000  | -2.241163000 |
| 6 | -6.988049000 | 1.232408000  | 0.775853000  |
| 6 | -7.231991000 | 0.238587000  | 1.907156000  |
| 6 | -6.287838000 | -0.941592000 | 1.779823000  |
| 6 | -6.366430000 | -1.514227000 | 0.374481000  |
| 6 | -6.107586000 | -0.428277000 | -0.668486000 |
| 6 | -6.210349000 | -0.885920000 | -2.131922000 |
| 8 | -5.720133000 | 1.789282000  | 0.960959000  |
| 8 | -7.060919000 | 0.911062000  | 3.138302000  |
| 8 | -6.660775000 | -1.890159000 | 2.749952000  |
| 8 | -7.095197000 | 0.594484000  | -0.469911000 |
| 8 | -4.973010000 | -0.840188000 | -2.803433000 |
| 1 | -7.373603000 | -1.933429000 | 0.221876000  |
| 1 | -7.757223000 | 2.014057000  | 0.784309000  |
| 1 | -8.261613000 | -0.135727000 | 1.808786000  |
| 1 | -5.258401000 | -0.583905000 | 1.943542000  |
| 1 | -5.105901000 | -0.008495000 | -0.514606000 |
| 1 | -6.568389000 | -1.915624000 | -2.208506000 |
| 1 | -6.948404000 | -0.236604000 | -2.621728000 |



|                                                  |              |              |              |
|--------------------------------------------------|--------------|--------------|--------------|
| 1                                                | -7.052111000 | 0.228440000  | 3.822942000  |
| 1                                                | -6.294786000 | -2.752327000 | 2.484887000  |
| 1                                                | -4.681765000 | 0.092429000  | -2.780733000 |
| 8                                                | -0.306242000 | -1.387371000 | -1.887821000 |
| 1                                                | -0.129079000 | -0.441299000 | -2.016086000 |
| 1                                                | -1.144196000 | -1.601485000 | -2.342620000 |
| 8                                                | 0.527784000  | 1.455401000  | -1.868994000 |
| 1                                                | 1.096221000  | 1.257246000  | -1.099709000 |
| 1                                                | 1.175429000  | 1.753319000  | -2.538556000 |
| 8                                                | 2.782367000  | 0.800991000  | -0.390011000 |
| 1                                                | 3.277588000  | 1.310902000  | 0.264819000  |
| 1                                                | 3.355296000  | 0.848434000  | -1.177208000 |
| <b><math>\gamma</math>-CD-4H<sub>2</sub>O(a)</b> |              |              |              |
| 6                                                | -6.876149000 | -0.031851000 | -0.346009000 |
| 6                                                | -7.432780000 | -1.108269000 | 0.583197000  |
| 6                                                | -6.371872000 | -2.145828000 | 0.883569000  |
| 6                                                | -5.781640000 | -2.675876000 | -0.412804000 |
| 6                                                | -5.251089000 | -1.514452000 | -1.255544000 |
| 6                                                | -4.730996000 | -1.937445000 | -2.614572000 |
| 8                                                | -5.913008000 | 0.701463000  | 0.354433000  |
| 8                                                | -7.881789000 | -0.484349000 | 1.768772000  |
| 8                                                | -6.983657000 | -3.158054000 | 1.640493000  |
| 8                                                | -6.329812000 | -0.604676000 | -1.502500000 |
| 8                                                | -3.954226000 | -0.927446000 | -3.228935000 |
| 1                                                | -6.561478000 | -3.211485000 | -0.975997000 |
| 1                                                | -7.686284000 | 0.623766000  | -0.685763000 |
| 1                                                | -8.266605000 | -1.606346000 | 0.066868000  |
| 1                                                | -5.557496000 | -1.658320000 | 1.444202000  |
| 1                                                | -4.447194000 | -1.003908000 | -0.705859000 |
| 1                                                | -4.093385000 | -2.818445000 | -2.500622000 |
| 1                                                | -5.588113000 | -2.210463000 | -3.245861000 |
| 1                                                | -8.080510000 | -1.201570000 | 2.387554000  |
| 1                                                | -6.358764000 | -3.900676000 | 1.728475000  |
| 1                                                | -4.379904000 | -0.055336000 | -3.105294000 |
| 6                                                | -4.709043000 | -4.838558000 | -0.598717000 |
| 6                                                | -4.464036000 | -5.851343000 | 0.520600000  |
| 6                                                | -3.065848000 | -5.690148000 | 1.088933000  |
| 6                                                | -2.063364000 | -5.718151000 | -0.053395000 |
| 6                                                | -2.397447000 | -4.610548000 | -1.050016000 |
| 6                                                | -1.434347000 | -4.478696000 | -2.228224000 |
| 8                                                | -4.752612000 | -3.564875000 | -0.024366000 |
| 8                                                | -5.450865000 | -5.675238000 | 1.516466000  |
| 8                                                | -2.864236000 | -6.743488000 | 1.997221000  |
| 8                                                | -3.697111000 | -4.921999000 | -1.570707000 |
| 8                                                | -0.395531000 | -3.573629000 | -1.932400000 |
| 1                                                | -2.158698000 | -6.676628000 | -0.586081000 |
| 1                                                | -5.648659000 | -5.060564000 | -1.117565000 |
| 1                                                | -4.535206000 | -6.857976000 | 0.082986000  |
| 1                                                | -2.997093000 | -4.709614000 | 1.587420000  |
| 1                                                | -2.436822000 | -3.638032000 | -0.538512000 |
| 1                                                | -0.964598000 | -5.439023000 | -2.462302000 |
| 1                                                | -2.019037000 | -4.154805000 | -3.101832000 |

|   |              |              |              |
|---|--------------|--------------|--------------|
| 1 | -5.161418000 | -6.200710000 | 2.275619000  |
| 1 | -1.930083000 | -6.737129000 | 2.274390000  |
| 1 | -0.806883000 | -2.710374000 | -1.741238000 |
| 6 | 0.133833000  | -6.619124000 | 0.192752000  |
| 6 | 0.940618000  | -6.960450000 | 1.445940000  |
| 6 | 1.896827000  | -5.836648000 | 1.791349000  |
| 6 | 2.713708000  | -5.492308000 | 0.555761000  |
| 6 | 1.770235000  | -5.080430000 | -0.571532000 |
| 6 | 2.445633000  | -4.650251000 | -1.876845000 |
| 8 | -0.778193000 | -5.608950000 | 0.518549000  |
| 8 | 0.041870000  | -7.231891000 | 2.501303000  |
| 8 | 2.703083000  | -6.281770000 | 2.854507000  |
| 8 | 0.969436000  | -6.236486000 | -0.864683000 |
| 8 | 2.474290000  | -3.245238000 | -2.024266000 |
| 1 | 3.272758000  | -6.382583000 | 0.229819000  |
| 1 | -0.399058000 | -7.512084000 | -0.154533000 |
| 1 | 1.543878000  | -7.851738000 | 1.216183000  |
| 1 | 1.311668000  | -4.947182000 | 2.075752000  |
| 1 | 1.120189000  | -4.262963000 | -0.243050000 |
| 1 | 3.486454000  | -4.988796000 | -1.906485000 |
| 1 | 1.894922000  | -5.123070000 | -2.699224000 |
| 1 | 0.574121000  | -7.261969000 | 3.308191000  |
| 1 | 3.382448000  | -5.605496000 | 3.026313000  |
| 1 | 1.565128000  | -2.926122000 | -2.160904000 |
| 6 | 4.972636000  | -4.726835000 | 0.757085000  |
| 6 | 5.730500000  | -4.091248000 | 1.919382000  |
| 6 | 5.657227000  | -2.575811000 | 1.847749000  |
| 6 | 6.073029000  | -2.122782000 | 0.457668000  |
| 6 | 5.205068000  | -2.810761000 | -0.590179000 |
| 6 | 5.487386000  | -2.398639000 | -2.035911000 |
| 8 | 3.611658000  | -4.469030000 | 0.935900000  |
| 8 | 5.189363000  | -4.583675000 | 3.127743000  |
| 8 | 6.503286000  | -2.072356000 | 2.851583000  |
| 8 | 5.433742000  | -4.220306000 | -0.469971000 |
| 8 | 4.541999000  | -1.451301000 | -2.484284000 |
| 1 | 7.125027000  | -2.403768000 | 0.293862000  |
| 1 | 5.160411000  | -5.806513000 | 0.731358000  |
| 1 | 6.787890000  | -4.379549000 | 1.823370000  |
| 1 | 4.612143000  | -2.265729000 | 2.009282000  |
| 1 | 4.149444000  | -2.596475000 | -0.387988000 |
| 1 | 6.473059000  | -1.934987000 | -2.141241000 |
| 1 | 5.465214000  | -3.306871000 | -2.652546000 |
| 1 | 5.563186000  | -4.041912000 | 3.835935000  |
| 1 | 6.710034000  | -1.143777000 | 2.643485000  |
| 1 | 3.679021000  | -1.906176000 | -2.458864000 |
| 6 | 6.957048000  | 0.026999000  | -0.169125000 |
| 6 | 7.397284000  | 1.107133000  | 0.815625000  |
| 6 | 6.280245000  | 2.108392000  | 1.023459000  |
| 6 | 5.822280000  | 2.651800000  | -0.318054000 |
| 6 | 5.439030000  | 1.509656000  | -1.261773000 |
| 6 | 5.139106000  | 2.004868000  | -2.665778000 |
| 8 | 5.935325000  | -0.715091000 | 0.429479000  |
| 8 | 7.755084000  | 0.491132000  | 2.035990000  |

|   |              |              |              |
|---|--------------|--------------|--------------|
| 8 | 6.782898000  | 3.116359000  | 1.864344000  |
| 8 | 6.544125000  | 0.606839000  | -1.376902000 |
| 8 | 4.381368000  | 1.084470000  | -3.424292000 |
| 1 | 6.641084000  | 3.239827000  | -0.761778000 |
| 1 | 7.804296000  | -0.620828000 | -0.422690000 |
| 1 | 8.259614000  | 1.634225000  | 0.381620000  |
| 1 | 5.426049000  | 1.586902000  | 1.484462000  |
| 1 | 4.559716000  | 0.983868000  | -0.863952000 |
| 1 | 4.551534000  | 2.926548000  | -2.606201000 |
| 1 | 6.096227000  | 2.229439000  | -3.158171000 |
| 1 | 7.853355000  | 1.209320000  | 2.677261000  |
| 1 | 6.176905000  | 3.878081000  | 1.833790000  |
| 1 | 4.662492000  | 0.172957000  | -3.199572000 |
| 6 | 4.642346000  | 4.741842000  | -0.652159000 |
| 6 | 4.416365000  | 5.792561000  | 0.435716000  |
| 6 | 3.040238000  | 5.621920000  | 1.049120000  |
| 6 | 2.009687000  | 5.613778000  | -0.065589000 |
| 6 | 2.309041000  | 4.492850000  | -1.058776000 |
| 6 | 1.319499000  | 4.415682000  | -2.227877000 |
| 8 | 4.713279000  | 3.489746000  | -0.037837000 |
| 8 | 5.431124000  | 5.669418000  | 1.410298000  |
| 8 | 2.850143000  | 6.695333000  | 1.937987000  |
| 8 | 3.604923000  | 4.786904000  | -1.601227000 |
| 8 | 0.403340000  | 3.344757000  | -2.077002000 |
| 1 | 2.082398000  | 6.561707000  | -0.619820000 |
| 1 | 5.564254000  | 4.954933000  | -1.205712000 |
| 1 | 4.456838000  | 6.784880000  | -0.037166000 |
| 1 | 3.001987000  | 4.652659000  | 1.571217000  |
| 1 | 2.331410000  | 3.515452000  | -0.559158000 |
| 1 | 0.734927000  | 5.338713000  | -2.299627000 |
| 1 | 1.905399000  | 4.298946000  | -3.148570000 |
| 1 | 5.155444000  | 6.226447000  | 2.152231000  |
| 1 | 1.949124000  | 6.643156000  | 2.303136000  |
| 1 | 0.940676000  | 2.504462000  | -2.219131000 |
| 6 | -0.134667000 | 6.576374000  | 0.310916000  |
| 6 | -0.914105000 | 6.855153000  | 1.595316000  |
| 6 | -1.892236000 | 5.733590000  | 1.879384000  |
| 6 | -2.738922000 | 5.494071000  | 0.639745000  |
| 6 | -1.829257000 | 5.153682000  | -0.540714000 |
| 6 | -2.559194000 | 4.843391000  | -1.851518000 |
| 8 | 0.732936000  | 5.505437000  | 0.533523000  |
| 8 | 0.005683000  | 7.030018000  | 2.651014000  |
| 8 | -2.672438000 | 6.123352000  | 2.981488000  |
| 8 | -1.004661000 | 6.305063000  | -0.760192000 |
| 8 | -2.281090000 | 3.531758000  | -2.330534000 |
| 1 | -3.294535000 | 6.412048000  | 0.395146000  |
| 1 | 0.426041000  | 7.471588000  | 0.020259000  |
| 1 | -1.496352000 | 7.775031000  | 1.434552000  |
| 1 | -1.325312000 | 4.812650000  | 2.091109000  |
| 1 | -1.199646000 | 4.291202000  | -0.283204000 |
| 1 | -3.642106000 | 4.900442000  | -1.714999000 |
| 1 | -2.259211000 | 5.593724000  | -2.592203000 |
| 1 | -0.509988000 | 7.019822000  | 3.469027000  |

|                                                  |              |              |              |
|--------------------------------------------------|--------------|--------------|--------------|
| 1                                                | -3.365367000 | 5.453412000  | 3.120175000  |
| 1                                                | -1.309388000 | 3.467471000  | -2.483202000 |
| 6                                                | -4.998963000 | 4.709415000  | 0.797124000  |
| 6                                                | -5.753279000 | 4.033036000  | 1.937117000  |
| 6                                                | -5.670953000 | 2.521388000  | 1.815465000  |
| 6                                                | -6.069350000 | 2.104262000  | 0.408696000  |
| 6                                                | -5.204274000 | 2.834308000  | -0.616719000 |
| 6                                                | -5.471899000 | 2.474912000  | -2.082722000 |
| 8                                                | -3.636508000 | 4.452336000  | 0.962739000  |
| 8                                                | -5.211271000 | 4.489499000  | 3.158341000  |
| 8                                                | -6.527291000 | 1.980576000  | 2.789793000  |
| 8                                                | -5.455429000 | 4.234217000  | -0.446680000 |
| 8                                                | -4.426835000 | 1.700216000  | -2.633490000 |
| 1                                                | -7.123498000 | 2.376281000  | 0.244017000  |
| 1                                                | -5.192974000 | 5.787982000  | 0.801020000  |
| 1                                                | -6.811977000 | 4.318862000  | 1.850749000  |
| 1                                                | -4.626355000 | 2.210366000  | 1.979081000  |
| 1                                                | -4.147433000 | 2.619853000  | -0.407138000 |
| 1                                                | -6.383505000 | 1.881444000  | -2.190630000 |
| 1                                                | -5.609137000 | 3.411443000  | -2.638165000 |
| 1                                                | -5.591008000 | 3.934965000  | 3.853453000  |
| 1                                                | -6.750517000 | 1.068531000  | 2.532421000  |
| 1                                                | -3.644554000 | 2.272272000  | -2.729248000 |
| 8                                                | -1.640062000 | -1.055865000 | -1.849952000 |
| 1                                                | -1.572632000 | -0.252444000 | -1.289833000 |
| 1                                                | -2.441270000 | -0.941832000 | -2.413052000 |
| 8                                                | 1.955576000  | 1.304419000  | -2.184360000 |
| 1                                                | 1.556899000  | 0.424672000  | -2.348958000 |
| 1                                                | 2.780444000  | 1.295120000  | -2.717456000 |
| 8                                                | 0.821850000  | -1.087949000 | -2.889682000 |
| 1                                                | -0.133499000 | -1.032738000 | -2.645479000 |
| 1                                                | 0.851949000  | -1.222453000 | -3.842464000 |
| 8                                                | -1.362428000 | 1.419302000  | -0.630171000 |
| 1                                                | -0.477540000 | 1.808834000  | -0.626914000 |
| 1                                                | -1.898552000 | 2.075875000  | -1.102482000 |
| <b><math>\gamma</math>-CD-5H<sub>2</sub>O(a)</b> |              |              |              |
| 6                                                | 6.894554000  | 0.277195000  | -0.554090000 |
| 6                                                | 7.435839000  | 1.410202000  | 0.315667000  |
| 6                                                | 6.337829000  | 2.399631000  | 0.644341000  |
| 6                                                | 5.643009000  | 2.852782000  | -0.628706000 |
| 6                                                | 5.138023000  | 1.633778000  | -1.398210000 |
| 6                                                | 4.488203000  | 1.981218000  | -2.721672000 |
| 8                                                | 6.006136000  | -0.482090000 | 0.213693000  |
| 8                                                | 7.974232000  | 0.844530000  | 1.493768000  |
| 8                                                | 6.937542000  | 3.463388000  | 1.337572000  |
| 8                                                | 6.254984000  | 0.785362000  | -1.694324000 |
| 8                                                | 3.776131000  | 0.889821000  | -3.267713000 |
| 1                                                | 6.349844000  | 3.421928000  | -1.252120000 |
| 1                                                | 7.722402000  | -0.343662000 | -0.916248000 |
| 1                                                | 8.215767000  | 1.936454000  | -0.254419000 |
| 1                                                | 5.584168000  | 1.886930000  | 1.264858000  |
| 1                                                | 4.413343000  | 1.094296000  | -0.771196000 |

|   |              |             |              |
|---|--------------|-------------|--------------|
| 1 | 3.771574000  | 2.793121000 | -2.566699000 |
| 1 | 5.265571000  | 2.335411000 | -3.414257000 |
| 1 | 8.169295000  | 1.589661000 | 2.079815000  |
| 1 | 6.282733000  | 4.177916000 | 1.441610000  |
| 1 | 4.341985000  | 0.096482000 | -3.268841000 |
| 6 | 4.422697000  | 4.943369000 | -0.784778000 |
| 6 | 4.202304000  | 5.940289000 | 0.353299000  |
| 6 | 2.886488000  | 5.633942000 | 1.036692000  |
| 6 | 1.781634000  | 5.614402000 | -0.006297000 |
| 6 | 2.088919000  | 4.588663000 | -1.093987000 |
| 6 | 1.059036000  | 4.537595000 | -2.225534000 |
| 8 | 4.571652000  | 3.676872000 | -0.211917000 |
| 8 | 5.283273000  | 5.856970000 | 1.259933000  |
| 8 | 2.675017000  | 6.628678000 | 2.010416000  |
| 8 | 3.340920000  | 4.971737000 | -1.681517000 |
| 8 | 0.015059000  | 3.634875000 | -1.949521000 |
| 1 | 1.731388000  | 6.600007000 | -0.493878000 |
| 1 | 5.309429000  | 5.211677000 | -1.370232000 |
| 1 | 4.143853000  | 6.948559000 | -0.082358000 |
| 1 | 2.951091000  | 4.634596000 | 1.494014000  |
| 1 | 2.176331000  | 3.583301000 | -0.657145000 |
| 1 | 0.605884000  | 5.524442000 | -2.370614000 |
| 1 | 1.595128000  | 4.268121000 | -3.147006000 |
| 1 | 4.991494000  | 6.319850000 | 2.058543000  |
| 1 | 1.849903000  | 6.424320000 | 2.485723000  |
| 1 | 0.398749000  | 2.734759000 | -1.952090000 |
| 6 | -0.335098000 | 6.407085000 | 0.716513000  |
| 6 | -1.045089000 | 6.378078000 | 2.067334000  |
| 6 | -1.962281000 | 5.172469000 | 2.177186000  |
| 6 | -2.861234000 | 5.148184000 | 0.951362000  |
| 6 | -2.002881000 | 5.099556000 | -0.306291000 |
| 6 | -2.771678000 | 4.985904000 | -1.620833000 |
| 8 | 0.574255000  | 5.347016000 | 0.674126000  |
| 8 | -0.067661000 | 6.393431000 | 3.086347000  |
| 8 | -2.685159000 | 5.316903000 | 3.373985000  |
| 8 | -1.254745000 | 6.321766000 | -0.339583000 |
| 8 | -2.870221000 | 3.636016000 | -2.031972000 |
| 1 | -3.458069000 | 6.071731000 | 0.933461000  |
| 1 | 0.183923000  | 7.364939000 | 0.594840000  |
| 1 | -1.676555000 | 7.277432000 | 2.126408000  |
| 1 | -1.350185000 | 4.255356000 | 2.179494000  |
| 1 | -1.311032000 | 4.251994000 | -0.255830000 |
| 1 | -3.794471000 | 5.363401000 | -1.524746000 |
| 1 | -2.242375000 | 5.589130000 | -2.368153000 |
| 1 | -0.527273000 | 6.202424000 | 3.915034000  |
| 1 | -3.418484000 | 4.676729000 | 3.376673000  |
| 1 | -1.992220000 | 3.343272000 | -2.341159000 |
| 6 | -5.097700000 | 4.280576000 | 0.920483000  |
| 6 | -5.864853000 | 3.577839000 | 2.038582000  |
| 6 | -5.840570000 | 2.080220000 | 1.836364000  |
| 6 | -6.306428000 | 1.737647000 | 0.431838000  |
| 6 | -5.454712000 | 2.476586000 | -0.600676000 |
| 6 | -5.860990000 | 2.274685000 | -2.065500000 |

|   |              |              |              |
|---|--------------|--------------|--------------|
| 8 | -3.723841000 | 4.025388000  | 1.071067000  |
| 8 | -5.297509000 | 3.944874000  | 3.278620000  |
| 8 | -6.673374000 | 1.501862000  | 2.812130000  |
| 8 | -5.564251000 | 3.881890000  | -0.335204000 |
| 8 | -4.780874000 | 1.860967000  | -2.876063000 |
| 1 | -7.367101000 | 2.014736000  | 0.321202000  |
| 1 | -5.280127000 | 5.359149000  | 0.976429000  |
| 1 | -6.911229000 | 3.912402000  | 1.978516000  |
| 1 | -4.800727000 | 1.725607000  | 1.935420000  |
| 1 | -4.415249000 | 2.144147000  | -0.491933000 |
| 1 | -6.625978000 | 1.503477000  | -2.168392000 |
| 1 | -6.279883000 | 3.223380000  | -2.423705000 |
| 1 | -5.697415000 | 3.369199000  | 3.944854000  |
| 1 | -6.891810000 | 0.601177000  | 2.517270000  |
| 1 | -4.065030000 | 2.518803000  | -2.762434000 |
| 6 | -6.996734000 | -0.396122000 | -0.469067000 |
| 6 | -7.522167000 | -1.594932000 | 0.316298000  |
| 6 | -6.397698000 | -2.565343000 | 0.612512000  |
| 6 | -5.628085000 | -2.904445000 | -0.655207000 |
| 6 | -5.144020000 | -1.611610000 | -1.309704000 |
| 6 | -4.380571000 | -1.775653000 | -2.608248000 |
| 8 | -6.158793000 | 0.333684000  | 0.371610000  |
| 8 | -8.105834000 | -1.116502000 | 1.509848000  |
| 8 | -6.974084000 | -3.703040000 | 1.202133000  |
| 8 | -6.300669000 | -0.819472000 | -1.613236000 |
| 8 | -3.661737000 | -0.596375000 | -2.924249000 |
| 1 | -6.282372000 | -3.454872000 | -1.348583000 |
| 1 | -7.831987000 | 0.221529000  | -0.820738000 |
| 1 | -8.266931000 | -2.110947000 | -0.308113000 |
| 1 | -5.690264000 | -2.072098000 | 1.299429000  |
| 1 | -4.494614000 | -1.077605000 | -0.601941000 |
| 1 | -3.653573000 | -2.585385000 | -2.500454000 |
| 1 | -5.082743000 | -2.038549000 | -3.411076000 |
| 1 | -8.290793000 | -1.899386000 | 2.047120000  |
| 1 | -6.290262000 | -4.393184000 | 1.270959000  |
| 1 | -4.246580000 | 0.196081000  | -2.873280000 |
| 6 | -4.288156000 | -4.900955000 | -0.925672000 |
| 6 | -4.074083000 | -6.016258000 | 0.100926000  |
| 6 | -2.788641000 | -5.777392000 | 0.869631000  |
| 6 | -1.657516000 | -5.577173000 | -0.125278000 |
| 6 | -1.975276000 | -4.379808000 | -1.017795000 |
| 6 | -0.903925000 | -4.026983000 | -2.048164000 |
| 8 | -4.558364000 | -3.725651000 | -0.224836000 |
| 8 | -5.194384000 | -6.063091000 | 0.959559000  |
| 8 | -2.573886000 | -6.900587000 | 1.692442000  |
| 8 | -3.156023000 | -4.754011000 | -1.746306000 |
| 8 | -0.027718000 | -3.021730000 | -1.574545000 |
| 1 | -1.595797000 | -6.455898000 | -0.784486000 |
| 1 | -5.117537000 | -5.153341000 | -1.596630000 |
| 1 | -3.969340000 | -6.964713000 | -0.446941000 |
| 1 | -2.897052000 | -4.858701000 | 1.467208000  |
| 1 | -2.182697000 | -3.481808000 | -0.421369000 |
| 1 | -0.290957000 | -4.905291000 | -2.284255000 |

|   |              |              |              |
|---|--------------|--------------|--------------|
| 1 | -1.416556000 | -3.707507000 | -2.965824000 |
| 1 | -4.948848000 | -6.649021000 | 1.689113000  |
| 1 | -1.753067000 | -6.758107000 | 2.195348000  |
| 1 | -0.562568000 | -2.217735000 | -1.356220000 |
| 6 | 0.436623000  | -6.508524000 | 0.444999000  |
| 6 | 1.212067000  | -6.711212000 | 1.745124000  |
| 6 | 2.174691000  | -5.563570000 | 1.991136000  |
| 6 | 3.008033000  | -5.340188000 | 0.737546000  |
| 6 | 2.070956000  | -5.064315000 | -0.434247000 |
| 6 | 2.750117000  | -4.704398000 | -1.755726000 |
| 8 | -0.458838000 | -5.448054000 | 0.613695000  |
| 8 | 0.277756000  | -6.860602000 | 2.791774000  |
| 8 | 2.969962000  | -5.905238000 | 3.099124000  |
| 8 | 1.304873000  | -6.258273000 | -0.632558000 |
| 8 | 2.585860000  | -3.325616000 | -2.062028000 |
| 1 | 3.589428000  | -6.247674000 | 0.515688000  |
| 1 | -0.102243000 | -7.428903000 | 0.193868000  |
| 1 | 1.812726000  | -7.626296000 | 1.626909000  |
| 1 | 1.591961000  | -4.647711000 | 2.181234000  |
| 1 | 1.393115000  | -4.243391000 | -0.170727000 |
| 1 | 3.828015000  | -4.887689000 | -1.710330000 |
| 1 | 2.318732000  | -5.334412000 | -2.543595000 |
| 1 | 0.777697000  | -6.828718000 | 3.618395000  |
| 1 | 3.640206000  | -5.209539000 | 3.220527000  |
| 1 | 1.620603000  | -3.129468000 | -2.083980000 |
| 6 | 5.246830000  | -4.486162000 | 0.857868000  |
| 6 | 5.977287000  | -3.728904000 | 1.962765000  |
| 6 | 5.847951000  | -2.229700000 | 1.759651000  |
| 6 | 6.250016000  | -1.869008000 | 0.339114000  |
| 6 | 5.428377000  | -2.686858000 | -0.652732000 |
| 6 | 5.701045000  | -2.390261000 | -2.132169000 |
| 8 | 3.876285000  | -4.256979000 | 1.006390000  |
| 8 | 5.442650000  | -4.135430000 | 3.204973000  |
| 8 | 6.669648000  | -1.604758000 | 2.714164000  |
| 8 | 5.701919000  | -4.070414000 | -0.408290000 |
| 8 | 4.633150000  | -1.678064000 | -2.732772000 |
| 1 | 7.321437000  | -2.084379000 | 0.202911000  |
| 1 | 5.467948000  | -5.557651000 | 0.922526000  |
| 1 | 7.044333000  | -3.988043000 | 1.894780000  |
| 1 | 4.790639000  | -1.945331000 | 1.888909000  |
| 1 | 4.368541000  | -2.487132000 | -0.463215000 |
| 1 | 6.594590000  | -1.774998000 | -2.265822000 |
| 1 | 5.869099000  | -3.346678000 | -2.642769000 |
| 1 | 5.800775000  | -3.532814000 | 3.870915000  |
| 1 | 6.864750000  | -0.703748000 | 2.402609000  |
| 1 | 3.862492000  | -2.280963000 | -2.757506000 |
| 8 | 1.182704000  | 1.148389000  | -2.242338000 |
| 1 | 1.454743000  | 0.547359000  | -1.520703000 |
| 1 | 1.934342000  | 1.078405000  | -2.858678000 |
| 8 | -1.779909000 | -1.109518000 | -0.943474000 |
| 1 | -1.741093000 | -0.379603000 | -0.301533000 |
| 1 | -2.359719000 | -0.763965000 | -1.648157000 |
| 8 | -1.555854000 | 1.339007000  | -2.795874000 |

|                                                  |              |              |              |
|--------------------------------------------------|--------------|--------------|--------------|
| 1                                                | -0.629704000 | 1.040007000  | -2.741259000 |
| 1                                                | -2.065672000 | 0.630831000  | -3.212474000 |
| 8                                                | 2.612289000  | -0.691633000 | -0.763398000 |
| 1                                                | 2.337598000  | -1.615722000 | -0.690350000 |
| 1                                                | 3.338839000  | -0.721473000 | -1.406719000 |
| 1                                                | -2.065713000 | 1.695372000  | -0.981852000 |
| 8                                                | -2.131891000 | 1.491632000  | -0.031993000 |
| 1                                                | -2.560846000 | 2.258049000  | 0.371269000  |
| <b><math>\gamma</math>-CD-6H<sub>2</sub>O(a)</b> |              |              |              |
| 6                                                | -6.357009000 | 1.792475000  | -0.342213000 |
| 6                                                | -7.172638000 | 0.892500000  | 0.585011000  |
| 6                                                | -6.491625000 | -0.443857000 | 0.798050000  |
| 6                                                | -6.132822000 | -1.068205000 | -0.540540000 |
| 6                                                | -5.278910000 | -0.084544000 | -1.333362000 |
| 6                                                | -4.875134000 | -0.543832000 | -2.717874000 |
| 8                                                | -5.193232000 | 2.223841000  | 0.318109000  |
| 8                                                | -7.357241000 | 1.566726000  | 1.813048000  |
| 8                                                | -7.376718000 | -1.239789000 | 1.542023000  |
| 8                                                | -6.030139000 | 1.119373000  | -1.522051000 |
| 8                                                | -3.919875000 | 0.333268000  | -3.276554000 |
| 1                                                | -7.052635000 | -1.303217000 | -1.097592000 |
| 1                                                | -6.962895000 | 2.654474000  | -0.641424000 |
| 1                                                | -8.141524000 | 0.704458000  | 0.098754000  |
| 1                                                | -5.547805000 | -0.271700000 | 1.342834000  |
| 1                                                | -4.362469000 | 0.119129000  | -0.759898000 |
| 1                                                | -4.421984000 | -1.537866000 | -2.656789000 |
| 1                                                | -5.773968000 | -0.607144000 | -3.348366000 |
| 1                                                | -7.778448000 | 0.929330000  | 2.407285000  |
| 1                                                | -7.063232000 | -2.162464000 | 1.517111000  |
| 1                                                | -4.197542000 | 1.254758000  | -3.113012000 |
| 6                                                | -5.742819000 | -3.436756000 | -0.897258000 |
| 6                                                | -5.911471000 | -4.518619000 | 0.168333000  |
| 6                                                | -4.581086000 | -4.755412000 | 0.850477000  |
| 6                                                | -3.529340000 | -5.059804000 | -0.200855000 |
| 6                                                | -3.438951000 | -3.931057000 | -1.226191000 |
| 6                                                | -2.438742000 | -4.189243000 | -2.361132000 |
| 8                                                | -5.418671000 | -2.247734000 | -0.233115000 |
| 8                                                | -6.894531000 | -4.100641000 | 1.094536000  |
| 8                                                | -4.749419000 | -5.823369000 | 1.751454000  |
| 8                                                | -4.741848000 | -3.794314000 | -1.814543000 |
| 8                                                | -1.208053000 | -3.539045000 | -2.142262000 |
| 1                                                | -3.813219000 | -5.978224000 | -0.737532000 |
| 1                                                | -6.663351000 | -3.317295000 | -1.480501000 |
| 1                                                | -6.222670000 | -5.448438000 | -0.330064000 |
| 1                                                | -4.288191000 | -3.832641000 | 1.375076000  |
| 1                                                | -3.159415000 | -2.991331000 | -0.729668000 |
| 1                                                | -2.227259000 | -5.260967000 | -2.444979000 |
| 1                                                | -2.909635000 | -3.856178000 | -3.296486000 |
| 1                                                | -6.819808000 | -4.704081000 | 1.847686000  |
| 1                                                | -3.903387000 | -5.975850000 | 2.209292000  |
| 1                                                | -1.369735000 | -2.574483000 | -2.220293000 |
| 6                                                | -1.750549000 | -6.527898000 | 0.416204000  |



|   |              |              |              |
|---|--------------|--------------|--------------|
| 6 | -1.103706000 | -6.828775000 | 1.765710000  |
| 6 | 0.088372000  | -5.916761000 | 1.997295000  |
| 6 | 1.005460000  | -5.999952000 | 0.788178000  |
| 6 | 0.233144000  | -5.629808000 | -0.472489000 |
| 6 | 1.059380000  | -5.614700000 | -1.756131000 |
| 8 | -2.312975000 | -5.251807000 | 0.487914000  |
| 8 | -2.081254000 | -6.681181000 | 2.774537000  |
| 8 | 0.715546000  | -6.346713000 | 3.179206000  |
| 8 | -0.806882000 | -6.604036000 | -0.620476000 |
| 8 | 1.544518000  | -4.312943000 | -2.016459000 |
| 1 | 1.370394000  | -7.032218000 | 0.684091000  |
| 1 | -2.517479000 | -7.278296000 | 0.190906000  |
| 1 | -0.733657000 | -7.864540000 | 1.735962000  |
| 1 | -0.272964000 | -4.878614000 | 2.084025000  |
| 1 | -0.214227000 | -4.635388000 | -0.361961000 |
| 1 | 1.932686000  | -6.269840000 | -1.678802000 |
| 1 | 0.419069000  | -5.971604000 | -2.571896000 |
| 1 | -1.608536000 | -6.685772000 | 3.618043000  |
| 1 | 1.546918000  | -5.851778000 | 3.288975000  |
| 1 | 0.789580000  | -3.756429000 | -2.285228000 |
| 6 | 3.383620000  | -5.694301000 | 0.966085000  |
| 6 | 4.216749000  | -5.172295000 | 2.134417000  |
| 6 | 4.573494000  | -3.714475000 | 1.937733000  |
| 6 | 5.208224000  | -3.529248000 | 0.570884000  |
| 6 | 4.256855000  | -4.039609000 | -0.510679000 |
| 6 | 4.764652000  | -3.934223000 | -1.955093000 |
| 8 | 2.099454000  | -5.125348000 | 1.024908000  |
| 8 | 3.497233000  | -5.377121000 | 3.332466000  |
| 8 | 5.454602000  | -3.353582000 | 2.974277000  |
| 8 | 4.007081000  | -5.430335000 | -0.256409000 |
| 8 | 3.912431000  | -3.162449000 | -2.774981000 |
| 1 | 6.159446000  | -4.083768000 | 0.533699000  |
| 1 | 3.303603000  | -6.784671000 | 1.033802000  |
| 1 | 5.155007000  | -5.747033000 | 2.146344000  |
| 1 | 3.652272000  | -3.108527000 | 1.960383000  |
| 1 | 3.324941000  | -3.469027000 | -0.441044000 |
| 1 | 5.745327000  | -3.457053000 | -2.005979000 |
| 1 | 4.862931000  | -4.956264000 | -2.342929000 |
| 1 | 3.971154000  | -4.893158000 | 4.022598000  |
| 1 | 5.943246000  | -2.562200000 | 2.688186000  |
| 1 | 3.020557000  | -3.558942000 | -2.711306000 |
| 6 | 6.534154000  | -1.702900000 | -0.274358000 |
| 6 | 7.369873000  | -0.746848000 | 0.574374000  |
| 6 | 6.648650000  | 0.569086000  | 0.790545000  |
| 6 | 6.147376000  | 1.125824000  | -0.534925000 |
| 6 | 5.265224000  | 0.071262000  | -1.199662000 |
| 6 | 4.647614000  | 0.450122000  | -2.529176000 |
| 8 | 5.447746000  | -2.139103000 | 0.484384000  |
| 8 | 7.648855000  | -1.384066000 | 1.804130000  |
| 8 | 7.554349000  | 1.434227000  | 1.426621000  |
| 8 | 6.092379000  | -1.074759000 | -1.447725000 |
| 8 | 3.622686000  | -0.464123000 | -2.874854000 |
| 1 | 7.003200000  | 1.358199000  | -1.186891000 |

|   |              |              |              |
|---|--------------|--------------|--------------|
| 1 | 7.151099000  | -2.552444000 | -0.590294000 |
| 1 | 8.298838000  | -0.532951000 | 0.024636000  |
| 1 | 5.763170000  | 0.380490000  | 1.420280000  |
| 1 | 4.447195000  | -0.195373000 | -0.515968000 |
| 1 | 4.197223000  | 1.443394000  | -2.449388000 |
| 1 | 5.429319000  | 0.480457000  | -3.300763000 |
| 1 | 8.076364000  | -0.717170000 | 2.359101000  |
| 1 | 7.176737000  | 2.332156000  | 1.425640000  |
| 1 | 3.951180000  | -1.388228000 | -2.796514000 |
| 6 | 5.705666000  | 3.471523000  | -0.927582000 |
| 6 | 5.857585000  | 4.616579000  | 0.073807000  |
| 6 | 4.528165000  | 4.893425000  | 0.748376000  |
| 6 | 3.463590000  | 5.106386000  | -0.314084000 |
| 6 | 3.386441000  | 3.878850000  | -1.220094000 |
| 6 | 2.347897000  | 3.958106000  | -2.343439000 |
| 8 | 5.441765000  | 2.306518000  | -0.204367000 |
| 8 | 6.850352000  | 4.270038000  | 1.017110000  |
| 8 | 4.698989000  | 6.030820000  | 1.559726000  |
| 8 | 4.675475000  | 3.751955000  | -1.841194000 |
| 8 | 1.173180000  | 3.247352000  | -2.010790000 |
| 1 | 3.742418000  | 5.970681000  | -0.935760000 |
| 1 | 6.618333000  | 3.359878000  | -1.524586000 |
| 1 | 6.153848000  | 5.517216000  | -0.484212000 |
| 1 | 4.247291000  | 4.012284000  | 1.346351000  |
| 1 | 3.177620000  | 2.980495000  | -0.624470000 |
| 1 | 2.056140000  | 4.996605000  | -2.535211000 |
| 1 | 2.814038000  | 3.555034000  | -3.253083000 |
| 1 | 6.778804000  | 4.919374000  | 1.730984000  |
| 1 | 3.842514000  | 6.246911000  | 1.968763000  |
| 1 | 1.429482000  | 2.319109000  | -1.746604000 |
| 6 | 1.652143000  | 6.604587000  | 0.115475000  |
| 6 | 1.033697000  | 7.114500000  | 1.419363000  |
| 6 | -0.148097000 | 6.250692000  | 1.812634000  |
| 6 | -1.102389000 | 6.151627000  | 0.632991000  |
| 6 | -0.357253000 | 5.566495000  | -0.563315000 |
| 6 | -1.211975000 | 5.337308000  | -1.811033000 |
| 8 | 2.251914000  | 5.370176000  | 0.368050000  |
| 8 | 2.034972000  | 7.123700000  | 2.414036000  |
| 8 | -0.759987000 | 6.836847000  | 2.936665000  |
| 8 | 0.680671000  | 6.497615000  | -0.895258000 |
| 8 | -1.359274000 | 3.952755000  | -2.103739000 |
| 1 | -1.470132000 | 7.154021000  | 0.365711000  |
| 1 | 2.391308000  | 7.325504000  | -0.251937000 |
| 1 | 0.662323000  | 8.133998000  | 1.234092000  |
| 1 | 0.218207000  | 5.237253000  | 2.040383000  |
| 1 | 0.092528000  | 4.606333000  | -0.282923000 |
| 1 | -2.217136000 | 5.748092000  | -1.673994000 |
| 1 | -0.735185000 | 5.858494000  | -2.649942000 |
| 1 | 1.583556000  | 7.264637000  | 3.257299000  |
| 1 | -1.520275000 | 6.284155000  | 3.189559000  |
| 1 | -0.445809000 | 3.609058000  | -2.265180000 |
| 6 | -3.448183000 | 5.900922000  | 1.060784000  |
| 6 | -4.219988000 | 5.261949000  | 2.209374000  |

|                                                  |              |              |              |
|--------------------------------------------------|--------------|--------------|--------------|
| 6                                                | -4.459929000 | 3.781867000  | 1.943944000  |
| 6                                                | -5.075234000 | 3.618919000  | 0.562918000  |
| 6                                                | -4.180573000 | 4.295655000  | -0.472742000 |
| 6                                                | -4.603493000 | 4.103684000  | -1.930452000 |
| 8                                                | -2.174813000 | 5.328741000  | 1.044410000  |
| 8                                                | -3.485808000 | 5.469131000  | 3.396984000  |
| 8                                                | -5.299224000 | 3.313575000  | 2.970394000  |
| 8                                                | -4.122576000 | 5.688166000  | -0.160930000 |
| 8                                                | -3.918383000 | 3.005652000  | -2.503223000 |
| 1                                                | -6.070209000 | 4.088882000  | 0.556999000  |
| 1                                                | -3.387054000 | 6.987067000  | 1.193188000  |
| 1                                                | -5.202616000 | 5.753473000  | 2.267614000  |
| 1                                                | -3.491966000 | 3.254886000  | 1.940162000  |
| 1                                                | -3.174093000 | 3.878152000  | -0.374943000 |
| 1                                                | -5.673627000 | 3.896673000  | -2.025627000 |
| 1                                                | -4.394632000 | 5.033887000  | -2.474710000 |
| 1                                                | -3.902732000 | 4.926468000  | 4.079713000  |
| 1                                                | -5.789428000 | 2.540776000  | 2.641079000  |
| 1                                                | -2.983432000 | 3.271222000  | -2.601540000 |
| 8                                                | -1.618904000 | -0.848301000 | -2.300788000 |
| 1                                                | -1.394542000 | -0.450500000 | -1.436060000 |
| 1                                                | -2.319013000 | -0.303707000 | -2.711265000 |
| 8                                                | 1.959060000  | 0.932138000  | -1.093334000 |
| 1                                                | 1.210564000  | 0.511310000  | -0.621315000 |
| 1                                                | 2.344578000  | 0.242085000  | -1.659455000 |
| 8                                                | 1.039234000  | -1.633669000 | -2.488027000 |
| 1                                                | 0.201013000  | -1.160278000 | -2.643922000 |
| 1                                                | 1.728433000  | -1.195260000 | -3.006128000 |
| 8                                                | -2.257493000 | 1.629858000  | -0.389854000 |
| 1                                                | -1.782066000 | 2.341749000  | -0.845673000 |
| 1                                                | -3.181440000 | 1.775697000  | -0.639826000 |
| 1                                                | 1.326972000  | -2.245788000 | -0.715085000 |
| 8                                                | 1.306634000  | -2.315614000 | 0.257888000  |
| 1                                                | 1.465164000  | -3.247412000 | 0.461718000  |
| 8                                                | -0.289751000 | -0.216076000 | -0.015493000 |
| 1                                                | -0.904505000 | 0.294659000  | 0.526657000  |
| 1                                                | 0.036079000  | -1.014989000 | 0.442720000  |
| <b><math>\gamma</math>-CD-7H<sub>2</sub>O(a)</b> |              |              |              |
| 6                                                | -6.314334000 | -2.286770000 | -0.510001000 |
| 6                                                | -6.443708000 | -3.473397000 | 0.444796000  |
| 6                                                | -5.087869000 | -4.059779000 | 0.782821000  |
| 6                                                | -4.329074000 | -4.368633000 | -0.498139000 |
| 6                                                | -4.223246000 | -3.087438000 | -1.317201000 |
| 6                                                | -3.510168000 | -3.233331000 | -2.642635000 |
| 8                                                | -5.735059000 | -1.206538000 | 0.169661000  |
| 8                                                | -7.111654000 | -3.040655000 | 1.613472000  |
| 8                                                | -5.328162000 | -5.203599000 | 1.561135000  |
| 8                                                | -5.546677000 | -2.630910000 | -1.627783000 |
| 8                                                | -3.264591000 | -1.966406000 | -3.222222000 |
| 1                                                | -4.867551000 | -5.137700000 | -1.073449000 |
| 1                                                | -7.304153000 | -2.011294000 | -0.891970000 |
| 1                                                | -7.029954000 | -4.252576000 | -0.065214000 |

|   |              |              |              |
|---|--------------|--------------|--------------|
| 1 | -4.499590000 | -3.308261000 | 1.335975000  |
| 1 | -3.692015000 | -2.337416000 | -0.714686000 |
| 1 | -2.541101000 | -3.714536000 | -2.483048000 |
| 1 | -4.111953000 | -3.867525000 | -3.309036000 |
| 1 | -7.044384000 | -3.775969000 | 2.239833000  |
| 1 | -4.489327000 | -5.688625000 | 1.670225000  |
| 1 | -4.087927000 | -1.446276000 | -3.214441000 |
| 6 | -2.599422000 | -6.055913000 | -0.616291000 |
| 6 | -2.066275000 | -6.877602000 | 0.558447000  |
| 6 | -0.838500000 | -6.203109000 | 1.134268000  |
| 6 | 0.163652000  | -5.990456000 | 0.014661000  |
| 6 | -0.453211000 | -5.137892000 | -1.091525000 |
| 6 | 0.474901000  | -4.898399000 | -2.287894000 |
| 8 | -3.057187000 | -4.838950000 | -0.105125000 |
| 8 | -3.080693000 | -7.012531000 | 1.533123000  |
| 8 | -0.336717000 | -7.048315000 | 2.142611000  |
| 8 | -1.595746000 | -5.860635000 | -1.579559000 |
| 8 | 1.185099000  | -3.685710000 | -2.177117000 |
| 1 | 0.422092000  | -6.967119000 | -0.423104000 |
| 1 | -3.408035000 | -6.592268000 | -1.126511000 |
| 1 | -1.770874000 | -7.866097000 | 0.176565000  |
| 1 | -1.127950000 | -5.219033000 | 1.536077000  |
| 1 | -0.777067000 | -4.167502000 | -0.687023000 |
| 1 | 1.216921000  | -5.700832000 | -2.364009000 |
| 1 | -0.147193000 | -4.919172000 | -3.193578000 |
| 1 | -2.635471000 | -7.325348000 | 2.333643000  |
| 1 | 0.485990000  | -6.661282000 | 2.490639000  |
| 1 | 0.518754000  | -2.971601000 | -2.228912000 |
| 6 | 2.498928000  | -6.128900000 | 0.490191000  |
| 6 | 3.277056000  | -5.954637000 | 1.792864000  |
| 6 | 3.779264000  | -4.528347000 | 1.939157000  |
| 6 | 4.525313000  | -4.150863000 | 0.670344000  |
| 6 | 3.597705000  | -4.314624000 | -0.529391000 |
| 6 | 4.193576000  | -3.883739000 | -1.865736000 |
| 8 | 1.312601000  | -5.402052000 | 0.591763000  |
| 8 | 2.444301000  | -6.326160000 | 2.870182000  |
| 8 | 4.596678000  | -4.499446000 | 3.081397000  |
| 8 | 3.266389000  | -5.703123000 | -0.608266000 |
| 8 | 3.894330000  | -2.524122000 | -2.117254000 |
| 1 | 5.383503000  | -4.826647000 | 0.545354000  |
| 1 | 2.288716000  | -7.191080000 | 0.320379000  |
| 1 | 4.158921000  | -6.611025000 | 1.743616000  |
| 1 | 2.911385000  | -3.855255000 | 2.043065000  |
| 1 | 2.679004000  | -3.733913000 | -0.383746000 |
| 1 | 5.284776000  | -3.974031000 | -1.867473000 |
| 1 | 3.776351000  | -4.533124000 | -2.643190000 |
| 1 | 2.896515000  | -6.043746000 | 3.676784000  |
| 1 | 5.087762000  | -3.658939000 | 3.097710000  |
| 1 | 2.949302000  | -2.455631000 | -2.350945000 |
| 6 | 6.363233000  | -2.586815000 | 0.612106000  |
| 6 | 6.914084000  | -1.748684000 | 1.764058000  |
| 6 | 6.368985000  | -0.341952000 | 1.690773000  |
| 6 | 6.639978000  | 0.255179000  | 0.321291000  |

|   |              |              |              |
|---|--------------|--------------|--------------|
| 6 | 6.053141000  | -0.648293000 | -0.765250000 |
| 6 | 6.328717000  | -0.236444000 | -2.215372000 |
| 8 | 4.988919000  | -2.813800000 | 0.822777000  |
| 8 | 6.576415000  | -2.367838000 | 2.987620000  |
| 8 | 6.980918000  | 0.410407000  | 2.710895000  |
| 8 | 6.606993000  | -1.966060000 | -0.613768000 |
| 8 | 5.157092000  | -0.254290000 | -3.006160000 |
| 1 | 7.726046000  | 0.378647000  | 0.181784000  |
| 1 | 6.887532000  | -3.547457000 | 0.570780000  |
| 1 | 8.006604000  | -1.703024000 | 1.643826000  |
| 1 | 5.274276000  | -0.378981000 | 1.820890000  |
| 1 | 4.967240000  | -0.670965000 | -0.627836000 |
| 1 | 6.720741000  | 0.778914000  | -2.281122000 |
| 1 | 7.084913000  | -0.923594000 | -2.615503000 |
| 1 | 6.787128000  | -1.730289000 | 3.683796000  |
| 1 | 6.852864000  | 1.349568000  | 2.494863000  |
| 1 | 4.736878000  | -1.129950000 | -2.883819000 |
| 6 | 6.456935000  | 2.539208000  | -0.438803000 |
| 6 | 6.561972000  | 3.825410000  | 0.380099000  |
| 6 | 5.188932000  | 4.363644000  | 0.737563000  |
| 6 | 4.315849000  | 4.439087000  | -0.506139000 |
| 6 | 4.245856000  | 3.049641000  | -1.133876000 |
| 6 | 3.384038000  | 2.918202000  | -2.371953000 |
| 8 | 6.011574000  | 1.520531000  | 0.399867000  |
| 8 | 7.322706000  | 3.549596000  | 1.535892000  |
| 8 | 5.383837000  | 5.622119000  | 1.330119000  |
| 8 | 5.581916000  | 2.704324000  | -1.524395000 |
| 8 | 3.128435000  | 1.555967000  | -2.654565000 |
| 1 | 4.764106000  | 5.138248000  | -1.227756000 |
| 1 | 7.436326000  | 2.288916000  | -0.864965000 |
| 1 | 7.059687000  | 4.579689000  | -0.248498000 |
| 1 | 4.709565000  | 3.659243000  | 1.437935000  |
| 1 | 3.873586000  | 2.329773000  | -0.391144000 |
| 1 | 2.421989000  | 3.404002000  | -2.191805000 |
| 1 | 3.876781000  | 3.418532000  | -3.216625000 |
| 1 | 7.270063000  | 4.344645000  | 2.084159000  |
| 1 | 4.515432000  | 6.046963000  | 1.449309000  |
| 1 | 3.971419000  | 1.056643000  | -2.751242000 |
| 6 | 2.514808000  | 6.016111000  | -0.750634000 |
| 6 | 1.941739000  | 6.983149000  | 0.287230000  |
| 6 | 0.705945000  | 6.395690000  | 0.941107000  |
| 6 | -0.258449000 | 5.958355000  | -0.148866000 |
| 6 | 0.425448000  | 4.930162000  | -1.046311000 |
| 6 | -0.443644000 | 4.368334000  | -2.171698000 |
| 8 | 3.056102000  | 4.919454000  | -0.074853000 |
| 8 | 2.944716000  | 7.279175000  | 1.235919000  |
| 8 | 0.156144000  | 7.395503000  | 1.764953000  |
| 8 | 1.523922000  | 5.618580000  | -1.663585000 |
| 8 | -1.059358000 | 3.150239000  | -1.801192000 |
| 1 | -0.506260000 | 6.825551000  | -0.779102000 |
| 1 | 3.285622000  | 6.519319000  | -1.345572000 |
| 1 | 1.635513000  | 7.896313000  | -0.245023000 |
| 1 | 0.999155000  | 5.508839000  | 1.525371000  |

|   |              |              |              |
|---|--------------|--------------|--------------|
| 1 | 0.807245000  | 4.087799000  | -0.453710000 |
| 1 | -1.246517000 | 5.068898000  | -2.428243000 |
| 1 | 0.197737000  | 4.239219000  | -3.054079000 |
| 1 | 2.503858000  | 7.750075000  | 1.956815000  |
| 1 | -0.660846000 | 7.050856000  | 2.166936000  |
| 1 | -0.355261000 | 2.511069000  | -1.526674000 |
| 6 | -2.590427000 | 6.211556000  | 0.237817000  |
| 6 | -3.438649000 | 6.230578000  | 1.509293000  |
| 6 | -4.006163000 | 4.854414000  | 1.795116000  |
| 6 | -4.704604000 | 4.335269000  | 0.547950000  |
| 6 | -3.710920000 | 4.314538000  | -0.609681000 |
| 6 | -4.256250000 | 3.743211000  | -1.920678000 |
| 8 | -1.427432000 | 5.475999000  | 0.484748000  |
| 8 | -2.637396000 | 6.702622000  | 2.571225000  |
| 8 | -4.886518000 | 4.970258000  | 2.885299000  |
| 8 | -3.309832000 | 5.670742000  | -0.841870000 |
| 8 | -3.611963000 | 2.525879000  | -2.275879000 |
| 1 | -5.544757000 | 4.997273000  | 0.288590000  |
| 1 | -2.340608000 | 7.238866000  | -0.050161000 |
| 1 | -4.283531000 | 6.912743000  | 1.329410000  |
| 1 | -3.172034000 | 4.171460000  | 2.024070000  |
| 1 | -2.831903000 | 3.724383000  | -0.323207000 |
| 1 | -5.323761000 | 3.516619000  | -1.833993000 |
| 1 | -4.120817000 | 4.498427000  | -2.704336000 |
| 1 | -3.134422000 | 6.540744000  | 3.384532000  |
| 1 | -5.287909000 | 4.097496000  | 3.046134000  |
| 1 | -2.644896000 | 2.704333000  | -2.331180000 |
| 6 | -6.544729000 | 2.791175000  | 0.742964000  |
| 6 | -6.931671000 | 1.850188000  | 1.876928000  |
| 6 | -6.245914000 | 0.504474000  | 1.704514000  |
| 6 | -6.504994000 | -0.025154000 | 0.302699000  |
| 6 | -6.094570000 | 1.021615000  | -0.730782000 |
| 6 | -6.265978000 | 0.591280000  | -2.191622000 |
| 8 | -5.174064000 | 3.039582000  | 0.857370000  |
| 8 | -6.574933000 | 2.459155000  | 3.101158000  |
| 8 | -6.752318000 | -0.344326000 | 2.703948000  |
| 8 | -6.861079000 | 2.207522000  | -0.500362000 |
| 8 | -5.030945000 | 0.205522000  | -2.772407000 |
| 1 | -7.577850000 | -0.251525000 | 0.199711000  |
| 1 | -7.115868000 | 3.724901000  | 0.799032000  |
| 1 | -8.018381000 | 1.688441000  | 1.825675000  |
| 1 | -5.157618000 | 0.644950000  | 1.807862000  |
| 1 | -5.037144000 | 1.249255000  | -0.574431000 |
| 1 | -6.934717000 | -0.269012000 | -2.285947000 |
| 1 | -6.713836000 | 1.427955000  | -2.742476000 |
| 1 | -6.648039000 | 1.773451000  | 3.779325000  |
| 1 | -6.625716000 | -1.266508000 | 2.418524000  |
| 1 | -4.492402000 | 1.015210000  | -2.867802000 |
| 8 | -0.754804000 | -1.745449000 | -2.013901000 |
| 1 | -1.029784000 | -1.762397000 | -1.060210000 |
| 1 | -1.569564000 | -1.576576000 | -2.522556000 |
| 8 | 0.960391000  | 1.713930000  | -0.808955000 |
| 1 | 0.741898000  | 1.082006000  | -0.096878000 |

|                                  |              |              |              |
|----------------------------------|--------------|--------------|--------------|
| 1                                | 1.704117000  | 1.332935000  | -1.303145000 |
| 8                                | 1.745087000  | -0.819745000 | -2.310065000 |
| 1                                | 0.768168000  | -0.917912000 | -2.266846000 |
| 1                                | 1.960216000  | -0.017650000 | -2.807657000 |
| 8                                | -2.974433000 | 0.101077000  | -0.731237000 |
| 1                                | -2.935875000 | 1.046766000  | -0.928610000 |
| 1                                | -3.672373000 | -0.229444000 | -1.317875000 |
| 1                                | 2.580512000  | -0.939718000 | -0.756638000 |
| 8                                | 2.851222000  | -0.888473000 | 0.186959000  |
| 1                                | 3.481242000  | -1.609952000 | 0.335197000  |
| 8                                | 0.609111000  | -0.175416000 | 1.264704000  |
| 1                                | 0.754839000  | 0.251952000  | 2.114759000  |
| 1                                | 1.483793000  | -0.569125000 | 0.996070000  |
| 8                                | -1.525332000 | -1.813510000 | 0.555960000  |
| 1                                | -0.769410000 | -1.378727000 | 0.992058000  |
| 1                                | -2.148188000 | -1.082060000 | 0.390346000  |
| <b>7H<sub>2</sub>O (cluster)</b> |              |              |              |
| 8                                | -0.451772000 | -1.835357000 | -2.064106000 |
| 1                                | -0.494223000 | -2.030703000 | -1.099714000 |
| 1                                | -1.270847000 | -1.321550000 | -2.176872000 |
| 8                                | -0.236652000 | 1.442135000  | -0.746576000 |
| 1                                | 0.105151000  | 1.196067000  | 0.132653000  |
| 1                                | 0.443517000  | 1.120665000  | -1.364713000 |
| 8                                | 1.502543000  | -0.192547000 | -2.185795000 |
| 1                                | 0.735130000  | -0.853008000 | -2.240660000 |
| 1                                | 1.920778000  | -0.156597000 | -3.051105000 |
| 8                                | -2.341762000 | -0.079228000 | -1.155697000 |
| 1                                | -1.599378000 | 0.571307000  | -1.012559000 |
| 1                                | -3.141251000 | 0.434446000  | -1.298789000 |
| 1                                | 2.314980000  | -0.880454000 | -0.809330000 |
| 8                                | 2.490920000  | -1.258373000 | 0.081828000  |
| 1                                | 2.139762000  | -2.155258000 | 0.052786000  |
| 8                                | 0.783558000  | 0.153099000  | 1.491118000  |
| 1                                | 1.089872000  | 0.433610000  | 2.358052000  |
| 1                                | 1.525819000  | -0.346674000 | 1.056730000  |
| 8                                | -1.011229000 | -1.799249000 | 0.590698000  |
| 1                                | -0.475290000 | -1.156541000 | 1.086949000  |
| 1                                | -1.768793000 | -1.283279000 | 0.266583000  |
